## Activity-Dependent Modulation of Synapse-Regulating Genes in Astrocytes

Farhy-Tselnicker I<sup>1,6</sup>, Boisvert MM<sup>1,7</sup>, Liu H<sup>2</sup>, Dowling C<sup>1</sup>, Erikson GA<sup>3</sup>, Blanco-Suarez E<sup>1,8</sup>,  
Farhy C<sup>5</sup>, Shokhirev M<sup>3</sup>, Ecker JR<sup>2,4</sup>, Allen NJ<sup>1</sup>

<sup>1</sup>Molecular Neurobiology Laboratory

<sup>2</sup>Genomic Analysis Laboratory

<sup>3</sup>Razavi Newman Integrative Genomics and Bioinformatics Core

<sup>4</sup>Howard Hughes Medical Institute

Salk Institute for Biological Studies

10010 N Torrey Pines Rd, La Jolla, CA, 92037, USA

<sup>5</sup>Sanford Burnham Prebys Medical Discovery Institute, 10901 N Torrey Pines Rd, La Jolla, CA, 92037, USA

<sup>6</sup>Present address: Department of Biology, Texas A&M University, 301 Old Main drive, College Station, TX, 77843, USA

<sup>7</sup>Present address: Jungers Center for Neuroscience Research, Department of Neurology, Oregon Health and Science University, Portland, OR, 97239, USA

<sup>8</sup>Present address: Department of Neurosurgery, Thomas Jefferson University Hospital for Neuroscience, 900 Walnut St, Philadelphia, PA, 19107, USA

Correspondence to:

Isabella Farhy-Tselnicker: [ifarhy@bio.tamu.edu](mailto:ifarhy@bio.tamu.edu)

Nicola J. Allen: [nallen@salk.edu](mailto:nallen@salk.edu)

## **Summary**

Astrocytes regulate the formation and function of neuronal synapses via multiple signals, however, what controls regional and temporal expression of these signals during development is unknown. We determined the expression profile of astrocyte synapse-regulating genes in the developing mouse visual cortex, identifying astrocyte signals that show differential temporal and layer-enriched expression. These patterns are not intrinsic to astrocytes, but regulated by visually-evoked neuronal activity, as they are absent in mice lacking glutamate release from thalamocortical terminals. Consequently, synapses remain immature. Expression of synapse-regulating genes and synaptic development are also altered when astrocyte signaling is blunted by diminishing calcium release from astrocyte stores. Single nucleus RNA sequencing identified groups of astrocytic genes regulated by neuronal and astrocyte activity, and a cassette of genes that show layer-specific enrichment. Thus, the development of cortical circuits requires coordinated signaling between astrocytes and neurons, identifying astrocytes as a target to manipulate in neurodevelopmental disorders.

## **Keywords**

Astrocytes, synapse development, gene expression, neuronal activity, visual cortex

## 1 **Introduction**

2 Synapses are points of contact where electro-chemical signals are transferred between neurons  
3 in a given circuit (Petzoldt and Sigrist, 2014; Südhof, 2018). In many brain regions, such as the  
4 mammalian visual cortex (VC), the majority of synapses are contacted by a process from an  
5 astrocyte, a major type of glial cell (Bernardinelli et al., 2014a; Genoud et al., 2006; Ventura and  
6 Harris, 1999). Synapse development is a complex multi-step process (Allen, 2013; Batool et al.,  
7 2019). In the VC, synapses begin to form at around postnatal day (P) 7, peak at P14, and stabilize  
8 towards P28, remaining stable to adulthood (Blue and Parnavelas, 1983a, b; Farhy-Tselnicker  
9 and Allen, 2018; Li et al., 2010). Within this time period numerous developmental programs are  
10 being executed from the molecular to the behavioral levels. Astrocytes appear in the cortex at  
11 birth, and populate the cortex, migrating, proliferating and maturing throughout the first postnatal  
12 month, coincidentally with synapse development (Farhy-Tselnicker and Allen, 2018). Synaptic  
13 deficits, for example caused by mutations in synapse-related genes expressed in either neurons  
14 or astrocytes, are associated with developmental disorders such as autism spectrum disorder and  
15 epilepsy (Lepeta et al., 2016). Therefore, understanding how synaptic development is regulated  
16 will provide important insights into how circuits form in health and malfunction in disease.  
17

18 In the past 20 years many astrocyte-secreted factors have been identified that regulate distinct  
19 stages of excitatory glutamatergic synapse formation and maturation (Baldwin and Eroglu, 2017).  
20 For example, thrombospondin family members induce formation of structurally normal but  
21 functionally silent synapses (Christopherson et al., 2005; Eroglu et al., 2009). Glypicans induce  
22 the formation of active synapses by recruiting GluA1 to the postsynaptic side (Allen et al., 2012;  
23 Farhy-Tselnicker et al., 2017) and chordin-like 1 induces synapse maturation by recruiting GluA2  
24 to the postsynaptic side (Blanco-Suarez et al., 2018). The majority of these signals have been  
25 identified using *in vitro* cell culture approaches and analyzed at distinct ages and across brain  
26 regions *in vivo*. To understand how these diverse signals act together to regulate formation of a  
27 complete circuit, it is important to determine when and where each of them is expressed *in vivo*,  
28 and how its expression correlates with the distinct stages of synaptic development that it  
29 regulates. Furthermore, the regulatory mechanisms that control the developmental expression  
30 level of these astrocyte synapse-regulating genes are largely unknown.  
31

32 We chose to address these questions by analyzing the *in vivo* development of both astrocytes  
33 and synapses in the mouse visual cortex (VC). The rodent VC is composed of heterogeneous  
34 populations of neurons, approximately 80% excitatory glutamatergic and 20% inhibitory  
35 GABAergic (Markram et al., 2004). Glutamatergic neurons are arranged in spatially defined  
36 layers, with distinct connectivity patterns between layers, as well as with other cortical and  
37 subcortical regions (Bannister, 2005; Douglas and Martin, 2004). The main subcortical region that  
38 projects to the VC is the lateral geniculate nucleus of the thalamus (LGN), relaying visual  
39 information received from the retina. Although thalamic projections arrive at the cortex before  
40 birth, synapses develop postnatally (Li et al., 2010; Lopez-Bendito and Molnar, 2003). Before eye-  
41 opening (from birth to ~ P12 in mice), spontaneous retinal activity evokes correlated cortical  
42 responses (Gribizis et al., 2019; Hanganu et al., 2006) that are important for the correct  
43 establishment of thalamo-cortical synapses (Cang et al., 2005). Eye-opening marks a step  
44 towards synapse maturation in the VC, with the appearance of visually-evoked neuronal  
45 responses across the retinal-LGN-VC circuit (Espinosa and Stryker, 2012; Hooks and Chen,  
46 2006, 2020). Preventing this step from taking place by methods of visual deprivation, such as  
47 rearing animals in the dark, has been shown to delay synaptic maturation in the VC of several  
48 species including mice at the transcriptomic (Hsu et al., 2018; Majdan and Shatz, 2006; Tropea  
49 et al., 2006), structural (Albanese et al., 1983; Freire, 1978) and functional levels (Desai et al.,  
50 2002; Funahashi et al., 2013; Ishikawa et al., 2014; Ko et al., 2014), as well as perturb structural  
51 astrocyte maturation (Müller, 1990; Stogsdill et al., 2017). This well-characterized process of

52 experience dependent synaptic development and maturation makes the VC an ideal place to  
53 investigate the role of astrocytes in regulating the different stages of synaptogenesis. Recent work  
54 has shown that similarly to neurons, cortical astrocytes are also spatially arranged in diverse  
55 populations (Batiuk et al., 2020; Bayraktar et al., 2020; John Lin et al., 2017; Lanjakornsiripan et  
56 al., 2018), in line with evidence from other brain regions showing astrocyte heterogeneity  
57 (Chaboub and Deneen, 2012; Chai et al., 2017; Khakh and Deneen, 2019; Oberheim et al., 2012;  
58 Rusnakova et al., 2013; Schitine et al., 2015). However, whether this astrocyte diversity has any  
59 impact on their regulation of synapse formation or maturation in the VC, is unknown.

60  
61 Here we use RNA sequencing and *in situ* hybridization to obtain the developmental transcriptome  
62 of astrocytes in the mouse VC *in vivo*. We find that astrocyte synapse-regulating genes display  
63 differential temporal and spatial expression patterns which correspond to stages of synapse  
64 initiation and maturation. Furthermore, we find that developmental regulation of these genes,  
65 namely glypican 4 and chordin-like 1, depends on visually evoked neuronal activity, with additional  
66 regulation by astrocyte  $Ca^{2+}$  activity. Manipulating either neuronal or astrocytic activity leads to  
67 shifts in synaptic development and maturation. Finally, single-nucleus RNA sequencing analysis  
68 reveals diverse populations of astrocytes in the developing VC, as well as identifies novel groups  
69 of genes that are regulated by neuronal and astrocyte activity. These findings demonstrate how  
70 astrocyte expression of synapse-regulating genes is controlled during development, and how  
71 synapse maturation is dependent on neuron-astrocyte communication. These data further provide  
72 an important resource for future studies of astrocyte development and astrocyte regulation of  
73 synapse formation.

## 74 **Results**

### 75 **Development of astrocytes and synapses in the mouse visual cortex**

76 To determine how synapse-regulating genes in astrocytes participate in synaptic development we  
77 first analyzed the development of astrocytes and synapses in the mouse visual cortex (VC) over  
78 the first postnatal month, focusing on ages correlating with stages of astrocyte and synapse  
79 development: postnatal day (P) 1, astrocytes are being born; P4, astrocytes continue to expand  
80 in the cortex, synapses not present; P7, synapse initiation; P14, start of synapse maturation; P28,  
81 stable synapses (Fig 1A,C). To provide spatial as well as temporal information to this data, all  
82 analyses were conducted separately in each cortical layer (L1, L2/3, L4, L5, L6) (Fig 1B,C).

83  
84 Since astrocytes are still migrating and dividing during this time we first sought to quantify how  
85 astrocyte density and/or the fraction of astrocytes relative to all other cells change with  
86 development. To do this we utilized the Aldh111-GFP mouse line (Dougherty et al., 2010; Tien et  
87 al., 2012), where astrocytes express GFP under the Aldh111 promoter. This line has been  
88 previously used to study astrocytes across development (John Lin et al., 2017; Stogsdill et al.,  
89 2017). Immunostaining of brain sections from Aldh111-GFP mice at P7 and P28 with antibodies  
90 against known astrocyte markers Aldh111, S100 $\beta$ , and Sox9 showed high overlap between GFP  
91 and marker positive cells (Fig S1D-F), further validating its usage. Close to birth (P1) very few  
92 astrocytes are present, comprising 0.5-2% of the total cell number in the VC (GFP positive cells  
93 as a percentage of all cells marked by the nuclear dye DAPI), with a significantly higher  
94 percentage of astrocytes in deeper layers than upper layers (Fig 1C-D, Table S1). The astrocyte  
95 percentage increases with development in all cortical layers, peaking at P21-P28. At this time  
96 astrocytes are ~10% of total cell number in L2-6, and ~ 50% in L1 (Fig 1C,D, Table S1). As the  
97 brain grows during the first postnatal month, the distance between cells grows to accommodate  
98 the increase in cell size and complexity, as evident by a significant decrease in DAPI positive  
99 nuclei per mm<sup>2</sup> that occurs from P1 to P14-P28 (Fig S1A, Table S1). Despite this decrease in  
100 total cell density, the density of astrocytes remains constant in all cortical layers and across ages,  
101 with the exception of L1-2/3, where astrocyte density is significantly lower at P1 (Fig 1C,E). This  
102 stability in astrocyte density is likely explained by new astrocytes still being generated in the weeks  
103 after birth (Ge et al., 2012).

104  
105 We next asked how synaptic proteins change across development within cortical layers to  
106 correlate with astrocyte development. We focused on glutamatergic synapses, as the majority of  
107 thus far identified astrocyte-expressed synapse-regulating factors are known to affect these  
108 synapses (Allen, 2013; Baldwin and Eroglu, 2017; Bosworth and Allen, 2017). To detect  
109 presynaptic terminals we stained with VGlut1 to identify local cortico-cortical connections (Fig  
110 1F,G, Fig S1B, Table S1), and VGlut2 to identify thalamo-cortical connections (Fig 1H,I, Fig S1C,  
111 Table S1) (Freneau et al., 2001). To detect postsynaptic AMPA glutamate receptors we stained  
112 for GluA1 subunits typically associated with immature synapses, and GluA2 subunits associated  
113 with mature synapses (Brill and Huguenard, 2008; Kumar et al., 2002) (Fig 1J-M, Table S1).  
114 VGlut1 immunoreactivity greatly increases between P7 and P14 in all cortical layers and remains  
115 stable at later ages (Fig 1G, Table S1). VGlut2 levels steadily increase from P1 to P14, and then  
116 remain stable. VGlut2 immunoreactivity is significantly higher in L1 and L4 than other layers at all  
117 ages, consistent with thalamic innervation zones (Fig 1I, Table S1)(Lopez-Bendito and Molnar,  
118 2003). GluA1 levels increase from P1 to P7 and then remain mostly constant through P28 (Fig  
119 1K, Table S1). GluA2 immunoreactivity significantly increases from P7 to P14 in L1-5, and then  
120 remains stable to P28 (Fig 1M, Table S1). At all ages, the levels of GluA1 and GluA2 are  
121 significantly higher in L1 than all other layers, with most prominent and statistically significant  
122 differences occurring at early time points (at P1-7 AMPAR subunit signal is ~2-7-fold higher in L1  
123 compared to L2-6; at P14-P28 AMPAR signal is 1.2-2-fold higher in L1 compared to L2-6; Table  
124 S1).

125  
126 Taken together this analysis shows that astrocyte numbers increase with postnatal development  
127 to represent ~10% of all cells in the VC by P21. Synaptic proteins increase in level across the  
128 same time period, with the majority of significant changes occurring between P7 and P14. Spatial  
129 analysis revealed astrocyte/synapse-specific patterns. While astrocyte numbers and AMPAR  
130 levels show higher abundance in L1, VGlut1 is evenly distributed across all layers. VGlut2 on the  
131 other hand is most abundant in L1 and 4 throughout development. Thus, astrocyte and synapse  
132 development during the first postnatal month is non-uniform and has specific spatial and temporal  
133 programs.

134  
135 **Determination of the astrocyte transcriptome across visual cortex development**  
136 In addition to increasing in number across postnatal development, astrocytes increase in size and  
137 morphological complexity (Bushong et al., 2004; Stogsdill et al., 2017) and undergo gene  
138 expression changes as shown by microarray studies (Cahoy et al., 2008). To specifically identify  
139 how the gene expression of VC astrocytes changes with development we performed RNA  
140 sequencing of bulk astrocyte mRNA at postnatal ages correlating to distinct stages of  
141 synaptogenesis (P7, P14, P28), as well as adult (P120; Fig 2A), using the previously  
142 characterized Ribo-tag method (Rpl22-HA; Gfap-cre73.12 – astrocyte-ribotag)(Boisvert et al.,  
143 2018). Similar to our previous analysis at P120, at P28 we found a high overlap between the HA  
144 ribosome tag and the astrocyte marker S100 $\beta$  by immunostaining, with minimal overlap with other  
145 cell type markers (Fig S2A-C), as well as significant enrichment in astrocyte-specific genes over  
146 other cell types in the mRNA isolated by HA immunopurification (IP) compared to total VC mRNA  
147 (input) (Fig S2D).

148  
149 To assess if there are broad changes in the transcriptomic profiles of astrocytes across  
150 development we performed principal component analysis (PCA) (Fig 2C). This showed that P7  
151 and P14 astrocytes form distinct clusters, while P28 and P120 astrocytes cluster together. To  
152 investigate this further, we analyzed the number of differentially expressed genes (DEGs; FDR  
153 <0.05) between each age group. DEGs are classified into total genes (all changes detected,  
154 FPKM >1), genes that are expressed by astrocytes (IP/input >0.75), and genes that are enriched  
155 in astrocytes (IP/input >3; Fig 2D, for definitions see also (Boisvert et al., 2018)). The largest  
156 number of DEGs is between P7 and P28 (~6000 total genes), and smallest numbers between  
157 P14 to P28 (~1000 total genes), and P28-P120 (~2000 total genes). Analysis of astrocyte-  
158 enriched genes (IP/input >3) showed that ~60% of all astrocyte-enriched genes are significantly  
159 changed from P7 to P14, while only ~20% are changing between P28 to P120 (Fig 2E). This  
160 shows that most changes in astrocyte gene expression are occurring between the first and second  
161 postnatal weeks, a time of transition from synapse formation to synapse maturation, and from  
162 spontaneous to visually-evoked neuronal activity.

163  
164 To determine the different astrocyte functions at each age we performed gene ontology (GO)  
165 analysis, focusing on Biological Processes terms (BP) (Fig S2F-H). This showed that genes  
166 common to all ages are enriched in GO terms related to cholesterol processing and serine  
167 synthesis, confirming the previously established important role of astrocytes in regulating brain  
168 cholesterol (Orth and Bellosta, 2012)(Fig S2G). Analysis of GO terms unique to each age showed  
169 that at P7 astrocyte genes are enriched in GO terms related to cortical development, while at P14  
170 astrocyte genes are enriched in GO terms related to Wnt and BMP signaling pathways.  
171 Conversely, adult astrocytes (P120) are enriched in terms related to regulation of extracellular  
172 matrix assembly and contact inhibition (Fig S2H). In all we found 547 GO terms common to all  
173 ages (more than 50% of all terms identified for each age), while terms unique to each age  
174 consisted less than 10% of all terms (Fig S2F). These results suggest that, for the most part,  
175 astrocytes perform core functions that are occurring at all developmental stages, while several

176 age-specific functions turn on and off depending on the developmental stage.

177

178 We next used this dataset to identify potential astrocyte marker genes across ages, as well as  
179 analyzing the developmental expression changes of key astrocyte genes. We determined that  
180 ApoE and Cst3 are the most highly expressed astrocyte genes at all ages (Fig 2F), while Lars2 is  
181 the most astrocyte-specific gene at all ages (Fig S2E). The expression of the known astrocyte  
182 marker Aldh1l1 is stable across all ages, making it an optimal marker for astrocytes at any age.  
183 On the other hand, S100 $\beta$  expression is upregulated later in development, making it a more  
184 suitable marker for adult astrocytes (Fig 2G), while vimentin expression is high at early time points,  
185 making it a good early-stage astrocyte marker. For genes that encode proteins important for  
186 astrocyte function, we found that the metabotropic glutamate receptor mGluR5 (Grm5) is most  
187 highly expressed at P7 and then declines with maturation, while the glutamate transporter Glt-1  
188 (Slc1a2) and the connexins (Gja1, Gjb6) are significantly upregulated from P14 onwards (Fig 2G).

189

190 Finally we focused on astrocyte genes that encode proteins known to regulate neuronal synapse  
191 number, function, and maturation (Fig 2H). These include astrocyte-secreted thrombospondins  
192 (Thbs), which induce silent synapse formation. The family members expressed by VC astrocytes  
193 show divergent expression, with Thbs1 being significantly higher at P7 than later ages, whereas  
194 Thbs4 is significantly lower at P7 than P120 (Fig 2H). This temporal expression profile fits with  
195 previous studies that have demonstrated important roles for Thbs1 in initial synapse formation at  
196 P7 (Christopherson et al., 2005), and suggested roles for Thbs4 in the adult brain (Benner et al.,  
197 2013). Similarly, glypican (Gpc) family members have a divergent expression. Gpc4, which  
198 induces formation of immature synapses (Allen et al., 2012), is most highly expressed at P7 and  
199 gradually declines with maturation, whereas Gpc6 peaks between P14-P28. Gpc5, a glypican  
200 family member with yet unknown function, has low expression at P7 and is significantly increased  
201 at all later ages. Astrocyte-secreted chordin like 1 (Chrdl1) regulates synapse maturation and its  
202 expression peaks at P14 (Blanco-Suarez et al., 2018) (Fig 2H). These changing temporal  
203 expression profiles are not limited to factors that promote synapse formation. Astrocyte  
204 phagocytic receptors involved in synapse elimination, Megf10 and Mertk (Chung et al., 2013),  
205 significantly increase in expression between P7 and P14, coincident with the initiation of synapse  
206 elimination. C4b, a component of the complement cascade involved in synapse elimination is  
207 significantly upregulated at P120 compared to all younger ages (Fig 2H).

208

209 In summary, the transcriptomic analysis reveals significant changes in astrocyte gene expression  
210 across development, with the most prominent changes being between P7 and later ages, a time  
211 between synapse initiation and maturation. It further points out the differential developmental  
212 expression patterns of synapse-regulating genes, such as Gpc4 peaking during synapse initiation,  
213 and Chrdl1 peaking after eye opening, when synapses begin to mature. These data can be further  
214 utilized to infer functional changes in astrocytic roles and inform further studies on astrocyte  
215 development. The complete dataset and GO term list are available in Tables S2A-B.

216

### 217 **Synapse-regulating genes in astrocytes show differential spatio-temporal expression**

218 Given the layer-specific alterations in astrocyte and synapse number that occur over development  
219 (Fig 1), along with developmental changes in astrocyte synapse-regulating gene expression  
220 shown by bulk RNA sequencing (Fig 2), we next asked if there are correlated layer-specific  
221 changes in astrocyte synapse-regulating genes that could be contributing to these effects. For  
222 example, the largest increase in GluA2 occurs in upper cortical layers between P7 and P14 (Fig  
223 1M), so we hypothesized that astrocyte Chrdl1 expression would follow the same spatial pattern.  
224 To determine layer-specific developmental changes in mRNA expression of synapse-regulating  
225 genes we performed single-molecule fluorescent in situ hybridization (smFISH; RNAscope) on  
226 brain sections of Aldh1l1-GFP mice and probed for 7 genes that regulate distinct aspects of

227 synaptogenesis: active synapse-regulating - glypicans (Gpc) 4, 5, 6; synapse maturation  
228 regulating – chordin-like 1 (Chrdl1); and silent synapse-regulating – thrombospondins (Thbs) 1,  
229 2, 4. Expression of each gene was analyzed within the territory of GFP positive astrocytes in each  
230 cortical layer and at 4 developmental time points: P4, P7, P14 and P28, when the most alterations  
231 in astrocyte and synapse development occur (Fig 1-2, Fig 3A-B, S3A). A negative control probe  
232 was used to determine the minimal signal threshold of detection (Fig S3H-I).

233  
234 We first analyzed glypicans, factors that promote active synapse formation. Bulk RNAseq showed  
235 that astrocyte Gpc4 expression is highest at P7 and gradually declines with maturation. Layer-  
236 specific analysis, however, shows that these differences are driven by astrocytes in L1: Gpc4  
237 expression decreases between P7 and P14 only in L1 astrocytes, staying stable across  
238 development in all other layers (Thresh area ( $\mu\text{m}^2$ ) L1: P4 3.08  $\pm$ 0.49; P7 4.14  $\pm$ 0.08; P14 1.72  
239  $\pm$ 0.2; P28 1.14  $\pm$ 0.26; Fig 3C,D, Table S3A,B). Gpc6, on the other hand, peaks at P14-P28 in  
240 bulk sequencing, and layer-specific analysis showed that this increase occurs in the majority of  
241 astrocytes, increasing between P7-P14 in L2-5 (with significant upregulation in L5), and remaining  
242 high at P28 (Thresh area ( $\mu\text{m}^2$ ) L5: P4 2.48  $\pm$ 0.42; P7 2.48  $\pm$ 0.38; P14 4.42  $\pm$ 0.41; P28 3.06  
243  $\pm$ 0.38; Fig 3E,F, Table S3A,B). Gpc5 is strongly upregulated at P14 in astrocytes in all layers and  
244 remains high at P28, matching the bulk RNAseq data (Thresh area ( $\mu\text{m}^2$ ) L1: P4 0.53  $\pm$ 0.13; P7  
245 1.33  $\pm$  0.18; P14 5.93  $\pm$ 0.73; P28 5.27  $\pm$ 1.11; Fig 3G,H, Table S3A,B).

246  
247 The expression of the synapse maturation factor Chrdl1 peaks at P14 in the bulk RNAseq data  
248 (Fig 2G). Spatial analysis revealed that this increase from P7 to P14 is layer-specific, with the  
249 largest increase in Chrdl1 occurring in upper layer astrocytes with significant upregulation in L2/3  
250 (Thresh area ( $\mu\text{m}^2$ ) L2/3: P4 4.1  $\pm$ 0.18; P7 4.11  $\pm$ 1.03; P14 9.93  $\pm$ 0.62; P28 7.59  $\pm$ 0.98; Fig 3I,J,  
251 Table S3A,B). Further, at its peak of expression, Chrdl1 is highest in L1-4 astrocytes compared  
252 to L5-6, demonstrating a heterogeneous expression across layers (Fig 3I,J, S3A, Table S3A,B).  
253 Finally, we analyzed astrocyte thrombospondins, factors that induce silent synapse formation (Fig  
254 S3B-G). Thbs mRNA levels in the VC are much lower at their peak expression than glypicans or  
255 Chrdl1, consistent with our bulk RNAseq results (Fig 2G, Table S2A), and previous studies  
256 showing low thrombospondin expression in the resting state and an upregulation by learning or  
257 injury (Nagai et al., 2019; Tyzack et al., 2014). The only significant developmental changes  
258 observed in our experiments are an increase in Thbs2 in L4-5 at P28 (Thresh area ( $\mu\text{m}^2$ ) L5: P4  
259 0.65  $\pm$ 0.1; P7 0.7  $\pm$ 0.19; P14 0.98  $\pm$ 0.11; P28 1.77  $\pm$ 0.27; Fig S3D,E, Table S3A,B), and an  
260 increase in Thbs4 in astrocytes in all layers at P28, again consistent with the bulk sequencing  
261 (Thresh area ( $\mu\text{m}^2$ ) L1: P4 0.05  $\pm$ 0.01; P7 0.13  $\pm$  0.06; P14 0.3  $\pm$ 0.08; P28 1.93  $\pm$  0.49; Fig S3  
262 F,G, Table S3A,B).

263  
264 In all, we have determined the spatio-temporal expression profile of key astrocyte synapse-  
265 regulating factors, identifying divergent developmental and layer-specific expression patterns  
266 within the same families of genes. These findings strongly suggest that astrocyte expression of  
267 synapse-regulating genes is closely tied to the developmental stage of the cortex, which features  
268 both changes in neuronal and astrocyte activities across development.

269  
270 **Neuronal activity tunes astrocyte expression of synapse-regulating genes**  
271 Having found broad differences in astrocyte expression of synapse-regulating genes across  
272 cortical layers, we next asked what regulates these layer-specific changes between P7 and P14.  
273 Given that during this time mouse eye-opening occurs, we hypothesized that blocking visually-  
274 evoked neuronal activity would disrupt these changes. Previous work, as well as our *in vitro*  
275 experiments using cultured astrocytes and neurons, show that Gpc4 mRNA expression (Hasel et  
276 al., 2017) and protein secretion from astrocytes (Fig S4A) are significantly reduced in the  
277 presence of neurons, suggesting neurons can influence expression and release of synapse-



278 regulating factors from astrocytes.

279

280 To prevent glutamate release from thalamic neurons that innervate the VC and relay information  
281 from the retina, we knocked out the vesicular glutamate transporter VGlut2 from neurons in the  
282 dLGN. Knockout of VGlut2 has been previously shown to abolish presynaptic release of glutamate  
283 in VGlut2 expressing neurons, in full or conditional knockout mouse models (Wallén-Mackenzie  
284 et al., 2010). We crossed VGlut2<sup>fl/fl</sup> (labeled as VGlut2 WT) mice to an ROR $\alpha$  cre line (VGlut2<sup>fl/fl;cre</sup>  
285 labeled as VGlut2 cKO), where cre recombinase is expressed in neurons in the thalamus  
286 including the dLGN (Fig 4A) (Chou et al., 2013; Farhy-Tselnicker et al., 2017). Immunostaining  
287 experiments showed a significant decrease in VGlut2 signal in the VC of VGlut2 cKO mice  
288 compared to WT at P14 (Fig 4B), with no overall effect on VGlut1 which marks cortico-cortical  
289 terminals (Fig 4C). A lack of VGlut2 signal in the VC could also result from an absence of thalamic  
290 axons innervating their target regions. To test whether that is the case we crossed ROR $\alpha$  cre and  
291 VGlut2 cKO mice with an Ai14 tdTomato reporter line to visualize dLGN axons (Fig 4A). All cre  
292 positive mice (WT, VGlut2 cHet, and VGlut2 cKO) showed a comparable number and volume of  
293 tdTomato labeled projections in L1 and L4 of the VC (Fig 4A, S4B-D). Analysis of VGlut2 puncta  
294 colocalized with tdTomato positive axons showed a significant decrease in number in VGlut2 cHet  
295 and VGlut2 cKO compared to WT (Fig S4B, D). These results show that in the VGlut2 cKO mice  
296 thalamic axons are present at their target layers in the VC but lack VGlut2 (as has been shown in  
297 studies performing similar manipulations (Li et al., 2013; Zechel et al., 2016)), suggesting they  
298 are functionally silent

299

300 Does the lack of visually-evoked neuronal activity impact the expression of synapse-regulating  
301 genes in astrocytes? To address this we performed smFISH at P14 probing for Gpc4, Gpc6 or  
302 Chrdl1, genes which showed the most robust layer-specific developmental changes in expression  
303 between P7 and P14, along with a probe for the glutamate transporter Glast (Slc1a3)(Ullensvang  
304 et al., 1997) to label astrocytes. The number of cortical astrocytes marked by Glast, and the  
305 expression level of Glast mRNA, are not affected by VGlut2 cKO in any cortical layer at P14,  
306 showing that gross astrocyte development proceeds normally in the absence of visual input (Fig  
307 S4E,F). During normal development Gpc4 expression significantly decreases between P7 and  
308 P14 specifically in L1 astrocytes (Fig 3C,D). In VGlut2 cKO mice this change no longer occurs  
309 (Fig 4D,E). Gpc4 expression is significantly increased in VGlut2 cKO compared to WT at P14  
310 specifically in L1 astrocytes, and unchanged in all other layers (Thresh area ( $\mu\text{m}^2$ ): L1 WT  $1.27 \pm$   
311  $0.13$ ; cKO  $2.32 \pm 0.15$ ; Fig 4D,E, Table S4A,B). Gpc6 expression is normally increasing in  
312 astrocytes in deep layers between P7 and P14 (Fig 3E,F). In the absence of thalamic glutamate  
313 release, Gpc6 is lower in astrocytes in layers 4 and 5 than in the WT at P14, showing that the  
314 normal developmental upregulation has been blocked (Thresh area ( $\mu\text{m}^2$ ): L4 WT  $2.73 \pm 0.36$ ;  
315 cKO  $1.53 \pm 0.11$ ; Fig 4F,G, Table S4A,B). Similarly, Chrdl1 expression normally increases in  
316 upper layer astrocytes between P7 and P14 (Fig 3I,J), however it is significantly decreased in  
317 VGlut2 cKO compared to WT specifically in astrocytes in upper layers (1-4), and not affected in  
318 deep layers at P14 (Thresh area ( $\mu\text{m}^2$ ): L1 WT  $5.98 \pm 0.41$ ; cKO  $4.62 \pm 0.51$ ; Fig4H,I, Table  
319 S4A,B). To determine if these alterations are due to the loss of visually-evoked neuronal activity  
320 at P14, rather than due to sustained suppression of glutamate release from thalamic neurons  
321 throughout development, we also analyzed the expression of Gpc4, Gpc6 and Chrdl1 at P7, and  
322 observed no difference in expression of any of these genes in the cKO (Fig S4I-K), nor any  
323 difference in the number of cortical astrocytes marked by Glast, or the expression level of Glast  
324 mRNA (Fig S4G,H). These results show that during visual cortex development from P7 to P14,  
325 glutamate release from thalamic neurons regulates the developmental expression of astrocyte  
326 Gpc4, Gpc6 and Chrdl1 in a layer-specific manner.

327

328 What is the consequence of altered expression of astrocyte synapse-regulating genes on synaptic

329 development? To address this we performed immunostaining for pre- and postsynaptic proteins  
330 in VGlut2 cKO mice and their WT controls in L1 of VC at P14. We first analyzed cortico-cortical  
331 synapses marked by VGlut1 and found that, as in the low-resolution characterization (Fig 4C),  
332 there is no change in VGlut1 puncta in the absence of VGlut2 (Fig 4J,K,N,O). In the case of GluA1  
333 containing AMPARs, which are regulated by Gpc4, we found a significant increase in the number  
334 of GluA1 puncta and their colocalization with VGlut1 in the VGlut2 cKO, correlating with the  
335 observed increase in Gpc4 (GluA1 FC 1.24  $\pm$  0.04; Fig 4J,L; Coloc FC 1.38  $\pm$  0.07 Fig 4J,M). For  
336 GluA2 containing AMPARs, which are regulated by Chrd11, we found a significant decrease in  
337 both the number of GluA2 puncta and the number of colocalized GluA2-VGlut1 puncta in VGlut2  
338 cKO mice compared to WT, correlating with the observed decrease in Chrd11 (GluA2 FC 0.77  
339  $\pm$  0.04 Fig 4N,P; Coloc FC 0.75  $\pm$  0.1 Fig 4 N,Q). We asked if similar effects are also present at  
340 thalamo-cortical synapses. Since VGlut2 is absent in cKO mice we used VGlut2f/f;  
341 RORacres;tdTomato to label thalamic axons (Fig 4A, Fig S4B), and identified presynaptic active  
342 zones within tdTomato axons by immunostaining for the pre-synaptic marker bassoon (Fig  
343 S4L,P). We found no difference in the number of bassoon puncta colocalized with tdTomato  
344 between the WT and cKO mice, a further indication that synapses form in the absence of VGlut2  
345 (Fig S4L-M, P-Q), and fitting with findings from mice that globally lack presynaptic release  
346 (Verhage et al., 2000). As is the case for cortico-cortical synapses, we found an increase in GluA1  
347 and colocalization of GluA1 with bassoon and tdTomato (GluA1 FC 1.21  $\pm$  0.09 Fig S4L,N; Coloc  
348 FC 1.36  $\pm$  0.23 Fig S4L,O), and a decrease in total GluA2 and GluA2-bassoon synapses (GluA2  
349 FC 0.70  $\pm$  0.08 Fig S4P,R; Coloc FC 0.65  $\pm$  0.13 Fig S4P,S). These results show that synaptic  
350 GluA1 and GluA2 levels are altered in VGlut2 cKO VC in the direction which follows the change  
351 in astrocytic expression of Gpc4 (which recruits GluA1) and Chrd11 (which recruits GluA2) in L1.  
352 These correlated changes in astrocyte genes and synaptic proteins suggest a delay in synapse  
353 maturation in the VC at P14 in the absence of thalamo-cortical glutamate release.  
354

### 355 **Astrocyte calcium signaling regulates expression of synapse-regulating genes**

356 Since we observed that changes in neuronal activity can regulate expression of astrocyte  
357 synapse-regulating genes, we next asked whether perturbing the astrocyte response to neuronal  
358 activity affects the expression of Gpc4, Gpc6 and Chrd11. Astrocytes express many  
359 neurotransmitter receptors, in particular GPCRs, and respond to the majority of neurotransmitters  
360 with increased intracellular calcium (Kofuji and Araque, 2020; Porter and McCarthy, 1997). In the  
361 case of somal increases in calcium, which have the potential to regulate expression of activity-  
362 regulated genes, most of this increase is mediated by the release of calcium from intracellular  
363 stores via Ip3r2 (Itp2) (Srinivasan et al., 2015). We therefore asked if blunting astrocyte calcium  
364 signaling by removing store-mediated calcium release using Ip3r2 KO mice (Fig 5A,B) has an  
365 impact on the expression of synapse-regulating genes.  
366

367 To determine this we performed smFISH on the VC of P14 Ip3r2 KO and WT mice, marking  
368 astrocytes with a probe against Glast along with Gpc4, Gpc6, or Chrd11. At P14 knocking out  
369 Ip3r2 does not affect the number of astrocytes or the expression levels of Glast (Slc1a3), showing  
370 astrocytes develop grossly normally when store-mediated calcium release is diminished (Fig  
371 S5A,B). However, loss of Ip3r2 does impact expression of synapse-regulating genes. In the case  
372 of Gpc4, the mRNA level is reduced in astrocytes in all layers, with a significant decrease  
373 occurring in L1, 4 and 6 (Thresh area ( $\mu\text{m}^2$ ): L1 WT 1.53  $\pm$  0.13; KO 1.11  $\pm$  0.1; Fig 5C,D, Table  
374 S4A,B). For Gpc6 there is no difference in the mRNA level between Ip3r2 KO and WT in  
375 astrocytes in any layer (Fig 5E,F, Table S4A,B). Chrd11 expression is increased in astrocytes in  
376 all layers, with a significant increase occurring in L1, 2/3 and 5 (Thresh area ( $\mu\text{m}^2$ ): L1 WT 7.32  $\pm$   
377 1.09; KO 10.64  $\pm$  0.97; Fig 5G,H, Table S4A,B). To ask if these alterations are present throughout  
378 development we performed the same analysis at P7. As with P14, at P7 there is no change in  
379 astrocyte number or Glast mRNA signal (Fig S5C,D). In the case of Gpc4 and Chrd11 there is no

380 difference in expression between Ip3r2 KO and WT at P7 (Fig S5E,G), whereas for Gpc6 there is  
381 a significant increase in the Ip3r2 KO restricted to L4 (Fig S5F). Therefore, in contrast to the layer-  
382 specific alterations in gene expression in the VGlut2 cKO mice, the effects of removing Ip3r2 are  
383 impacting astrocytes in all layers and do not strictly follow the developmental trajectory. This  
384 suggests a broad requirement for astrocyte calcium signaling in all astrocytes to maintain the  
385 correct level of gene expression, and that the signals to do this come from multiple sources and  
386 are not restricted to thalamic inputs.

387  
388 What are the consequences of diminished astrocyte calcium signaling and altered expression of  
389 synapse-regulating genes on synaptic development? As with the VGlut2 cKO, we addressed this  
390 by performing immunostaining for presynaptic terminals (VGlut1 or VGlut2) and postsynaptic  
391 AMPAR subunits (GluA1 or GluA2) in Ip3r2 KO mice and WT controls in L1 of VC at P14. We  
392 found that the numbers of both cortico-cortical presynaptic terminals marked by VGlut1 and  
393 thalamo-cortical presynaptic terminals marked by VGlut2 are significantly decreased in Ip3r2 KO  
394 mice compared to WT, demonstrating a global deficit in synapse formation in the absence of  
395 astrocyte calcium signaling (VGlut1 from GluA1: FC  $0.86 \pm 0.04$  Fig 5I,J; VGlut1 from GluA2: FC  
396  $0.87 \pm 0.05$  Fig 5M,N. VGlut2 from GluA1: FC  $0.89 \pm 0.05$  Fig S5H,I; VGlut2 from GluA2: FC  $0.80$   
397  $\pm 0.05$  Fig S5L,M). For GluA1 containing AMPARs, which are regulated by Gpc4, we found a  
398 significant decrease in the total number of puncta and their colocalization with VGlut1 and VGlut2  
399 in the Ip3r2 KO, correlating with the observed decrease in Gpc4 mRNA (VGlut1-GluA1: GluA1  
400 FC  $0.84 \pm 0.03$  Fig 5I,K; Coloc FC  $0.70 \pm 0.03$  Fig 5I,L. VGlut2-GluA1: GluA1 FC  $0.83 \pm 0.03$  Fig  
401 S5H,J; Coloc FC  $0.74 \pm 0.03$  Fig S5H,K). For GluA2 containing AMPARs, which are regulated by  
402 Chrdl1, we found a significant increase in their number, correlating with the observed increase in  
403 Chrdl1 (VGlut1-GluA2: GluA2 FC  $1.22 \pm 0.07$  Fig 5M,O. VGlut2-GluA2: GluA2 FC  $1.14 \pm 0.03$  Fig  
404 S5L,N). The number of colocalized presynaptic puncta and GluA2 is, however, unchanged, likely  
405 due to the opposing decrease in presynaptic puncta and increase in GluA2 (VGlut1-GluA2 Coloc  
406 FC  $1.09 \pm 0.1$  Fig 5M,P; VGlut2-GluA2 Coloc FC  $1.00 \pm 0.08$  Fig S5L,O).

407  
408 Taken together these results show that GluA1 and GluA2 levels are altered in Ip3r2 KO VC in the  
409 direction which follows the change in astrocytic expression of Gpc4 (which recruits GluA1) and  
410 Chrdl1 (which recruits GluA2). This strongly suggests that both astrocytes and neurons play an  
411 important role in regulating the expression of synapse-regulating genes, and subsequently  
412 AMPAR subunit protein levels, and the final expression levels arise from the complex interaction  
413 between these two cell types.

414  
415 **Unbiased determination of astrocyte diversity and activity-regulated genes in the**  
416 **developing visual cortex**

417 Having found that multiple synapse-regulating genes in astrocytes show layer-specific  
418 enrichment, and that these patterns are regulated by neuronal and astrocyte activity, we next  
419 asked if these findings are specific to synapse development, or if other astrocyte genes show a  
420 similar pattern. To address this using an unbiased approach we performed single-nucleus RNA  
421 sequencing of glial cells isolated from the P14 VC of wild type, VGlut2 cKO, and Ip3r2 KO mice.  
422 To isolate the glial cell populations we immunostained VC nuclei in suspension with an antibody  
423 against the neuronal marker NeuN, and performed FACS to select the NeuN-negative population  
424 (Fig 6A). We used the Chromium 10X system to isolate individual glial nuclei and performed RNA  
425 sequencing to quantify mRNA levels (Fig 6A). This identified 22,781 cells in the VGlut2 condition  
426 (cKO and WT) (Fig 6B), and 21,240 cells in the Ip3r2 condition (KO and WT) (Fig S6A). Initial  
427 clustering analysis determined 17 distinct cell populations in both models, with the majority of  
428 cells detected clustered within the main glial cell types: astrocytes, microglia, and oligodendrocyte  
429 lineage cells (Fig 6B,C, S6A,B). Just two clusters enriched for neuronal markers are present,  
430 showing that the NeuN depletion had been successful.

431

### 432 **Determination of astrocyte layer-enriched genes in the developing wild-type VC**

433 We focused our downstream analysis on astrocytes. A second round of unbiased clustering of  
434 the astrocyte population identified 4 distinct groups (Fig 6D, S6D). By comparing the genes  
435 enriched in each cluster with datasets in the literature, we determined these to anatomically  
436 correspond to upper (up) (L1-2/3), middle (mid) (L2/3-5), deep (L5-6) layer, and white matter (WM)  
437 astrocytes (Fig S6C) (Batiuk et al., 2020; Bayraktar et al., 2020; Lanjakornsiripan et al., 2018).  
438 For example, *Id3* is enriched in deep layer astrocytes and *Gfap* is enriched in white matter  
439 astrocytes (Fig 6D, S6D). We also determined the fractions of astrocytes present in each group  
440 and found that this corresponds to the fractions we identified via anatomical cell counts (Fig  
441 S6C,E), showing that the process of nuclear isolation has captured astrocytes in levels that reflect  
442 their *in vivo* abundance.

443

444 We first asked how many DEGs are present between the different layer groups by performing  
445 pairwise comparisons, using the WT astrocytes from either model as the input cells. This identified  
446 between 200-700 DEGs depending on the layer groups compared in the VGlut2 cKO model, with  
447 similar numbers obtained in the WT astrocytes from the *Ip3r2* model, demonstrating  
448 reproducibility of the results (Fig 6E,F, S6F). The most numerous and robust differences are  
449 between the deep and upper layer astrocytes, with over 700 DEGs and up to 6-fold log<sub>2</sub> FC in  
450 expression level (Fig 6E,F, S6F). On the other hand, upper and mid astrocytes are the most  
451 similar, with about 200 DEGs and 2-fold log<sub>2</sub> FC maximal difference in mRNA level (Fig 6F, Table  
452 S5A,B).

453

454 Next, we asked how astrocyte marker, function, and synapse-regulating genes highlighted in the  
455 bulk RNAseq dataset (Fig 2G,H) are expressed across layers (Fig S6G). Overall, we found a  
456 positive correlation between levels of gene expression obtained by the two sequencing methods,  
457 meaning, genes that were shown to be highly expressed in the bulk dataset (such as *ApoE*), were  
458 also highly expressed in the snRNAseq dataset (Fig S6G). Unsurprisingly, sequencing of bulk  
459 RNA samples was more sensitive in detecting the low expressed genes, such as *Gpc4*, *Tgfb1*  
460 and *Thbs1*, which were below detection level in the snRNAseq dataset. Of genes that showed  
461 detectable expression levels with the snRNAseq method, most exhibited similar expression levels  
462 across layers with some notable exceptions. For example, *Gfap* and *Aqp4* expression is higher in  
463 deep and WM astrocytes than in upper and mid groups, while the expression of connexin 43  
464 (*Gja1*) is highest in deep layer astrocytes compared to all other groups (Fig S6G).

465

466 To identify potential astrocyte layer markers we plotted the top 20 most differentially expressed  
467 genes for each pairwise comparison (Fig 6F). We found *Dcc* enriched in the upper layer group,  
468 consistent with previous studies (Bayraktar et al., 2020; Lanjakornsiripan et al., 2018). In addition,  
469 we found several layer-enriched genes that are absent from published datasets such as *Kcnd2*,  
470 a gene that is enriched in the mid-layer group, *Tmem132b* which is enriched in the deep  
471 astrocytes, and *Unc5c*, which is enriched in the white matter group. Importantly, while there are  
472 differences in astrocyte gene expression across layer groups, these are mostly gradients of gene  
473 expression, suggesting the astrocyte layer groups are on a continuum rather than distinct cell  
474 types (Fig 6D, S6D)(Bayraktar et al., 2020; John Lin et al., 2017). GO terms analysis of genes  
475 enriched in each cluster identified between 300-600 terms significantly enriched per cluster, with  
476 140 terms that are common to all 4 clusters, and between 40-120 terms that are unique to each  
477 cluster (Fig S6H). Terms with the highest gene ratio in the upper astrocyte cluster include  
478 pathways related to signal transduction and potassium ion homeostasis, whereas mid astrocytes  
479 are enriched in terms related to GABAergic signaling and PSD95 clustering. Genes belonging to  
480 the deep astrocyte cluster are enriched in GO terms related to the regulation of pre- and post-  
481 synapse organization, while WM astrocyte genes are enriched with pathways related to axonal

482 guidance, maintenance and signaling (Fig S6I,J, Table S5C). These results show that wild-type  
483 astrocytes in the developing VC are transcriptomically diverse, but not distinct, in accordance with  
484 previous studies in which astrocyte diversity was assessed at a similar developmental stage  
485 (Bayraktar et al., 2020).

486

### 487 **Global astrocyte gene expression changes following silencing of neuronal or astrocyte** 488 **activity**

489 Given we found that astrocyte synapse-regulating genes are regulated by both neuronal and  
490 astrocyte activity, we next asked what other astrocyte genes are affected by these activity  
491 manipulations. To increase the power of our analysis we combined the 4 astrocyte subpopulations  
492 into one group for each genotype and used this combined group to identify DEGs between the  
493 WT and KO. We found 61 DEGs for the VGlut2 cKO model, and 131 DEGs for the Ip3r2 model  
494 (Fig 7A-C, Table S6A). Performing the same analysis on two other abundant glial populations,  
495 OPCs and microglia, showed 28 DEGs for OPCs and 24 DEGs for microglia in the VGlut2 cKO  
496 model, and 38 DEGs for OPCs and 29 DEGs for microglia in the Ip3r2 KO model, 20-50% of the  
497 astrocyte DEG level. This suggests astrocytes are more sensitive to neuronal activity changes,  
498 as well as more profoundly affected by silencing their calcium activity. GO terms analysis of  
499 astrocyte DEGs in the VGlut2 cKO model revealed enrichment for pathways related to  
500 microtubule activity, axonal elongation and transport in the upregulated genes, and regulation of  
501 intracellular signal transduction related pathways in the downregulated genes (Fig S7A, Table  
502 S6D). In the Ip3r2 KO model, upregulated genes are enriched for signal transduction and  
503 response to alcohol, while downregulated genes are enriched in cAMP metabolism and pathways  
504 related to cellular biosynthesis processes (Fig S7B, Table S6D).

505

506 As our smFISH analysis of Gpc4 and Chrdl1 identified that they are regulated in opposite  
507 directions by neuronal and astrocyte activity (Figs 4,5), we asked whether the DEGs identified by  
508 snRNAseq are similarly regulated. We found a total of 19 DEGs that are significantly altered in  
509 both the VGlut2 cKO and Ip3r2 KO models (Fig 7D). Only 1 gene was commonly upregulated,  
510 and only 3 genes commonly downregulated (21% of total common DEGs), while the remaining  
511 15 genes showed opposing changes (79% of common DEGs; Fig 7D heatmap). The same effect  
512 of opposing changes was observed when the overlap between the enriched GO terms was  
513 compared (Fig S7C). For example, the term “intracellular signal transduction” is enriched in the  
514 downregulated gene list in the VGlut2 cKO model, whereas in the Ip3r2 KO model it is enriched  
515 in the upregulated gene list (Table S6D). Thus, opposing effects of neuronal and astrocyte activity  
516 extend beyond synapse-regulating genes.

517

518 Since we found that neuronal activity is important for regulating layer-specific expression of Gpc4,  
519 Gpc6 and Chrdl1 (Figs 3,4), we next asked if this is true for other DEGs identified in the snRNAseq  
520 dataset (Fig 7A-C). To address this we compared the list of neuronal or astrocyte activity-  
521 regulated DEGs with the list of layer enriched genes from the WT (Fig 6E,F, S6F, Table S5A-B).  
522 This identified 43 common genes in the VGlut2 cKO model (70% of all cKO/WT DEGs; Fig 7E),  
523 and 101 common DEGs in the Ip3r2 model (77% of all KO/WT DEGs; Fig 7F). Of these, some  
524 genes show a dysregulated layer-expression when activity is altered, similar to the findings  
525 described in Fig 4. For example, expression of Mapk10 is lowest in WM astrocytes in the WT,  
526 however in astrocytes from the VGlut2 cKO Mapk10 is upregulated in WM astrocytes compared  
527 to deep. Similarly, the expression of Pde10a is higher in the upper astrocyte group than other  
528 groups in WT, while in the Ip3r2 KO the level in that group is now low. Nevertheless, we also  
529 found many genes that while having different expression levels than WT after activity  
530 manipulation, still maintained their layer-enriched expression. For example, WT expression of the  
531 gene Gm47283 is higher in the upper than deep layer group. In the VGlut2 cKO while Gm47283  
532 is upregulated in all groups, the relative expression between layers is maintained (Fig 7E). A

533 similar pattern was observed in the Ip3r2 KO model for the gene *Stk38l* (Fig 7F). Thus,  
534 perturbation of neuronal or astrocyte activity influences the layer enrichment of some but not all  
535 genes, without causing gross rearrangement of overall astrocyte spatial identity.

536

537 Is neuronal and/or astrocyte activity necessary for regulating developmental changes in astrocytic  
538 gene expression? Our spatial smFISH analysis showed that developmental changes in *Gpc4*,  
539 *Gpc6* and *Chrdl1* are attenuated by blocking neuronal activity, resulting in opposite expression  
540 levels in *VGlut2* cKO mice to those seen during normal development (Fig 4). On the other hand,  
541 astrocyte activity does not appear to regulate developmental astrocyte gene expression, with  
542 some genes in the *Ip3r2* KO changing in the same direction as development (*Gpc4*, *Chrdl1*), with  
543 no effect on others (*Gpc6*) (Fig 5). To test if this is a general phenomenon beyond synapse-  
544 regulating genes we identified DEGs between P7 and P14 in our bulk RNAseq data (FC P14/P7  
545 Fig 7G,H, Table S6C). We compared the DEG lists of *VGlut2* cKO and *Ip3r2* KO models against  
546 the genes that are significantly up- or down-regulated at P14 compared to P7 in the bulk data, in  
547 search for common genes (Fig 7G,H). This identified 30 DEGs from the *VGlut2* cKO dataset (52%  
548 of all cKO/WT DEGs, Fig 7G), and 57 genes from the *Ip3r2* KO dataset (44% of all KO/WT DEGs,  
549 Fig 7H). Comparing the direction of expression changes between normal development and the  
550 *VGlut2* cKO DEGs, we observed that 70% of all common genes were regulated in the opposite  
551 direction (Fig 7G), similar to results found for *Gpc4*, *Gpc6* and *Chrdl1* (Fig 4), suggesting strong  
552 dependence of astrocyte developmental maturation on neuronal cues. On the other hand, *Ip3r2*  
553 KO data showed 50% of genes displaying the same directionality as during normal development,  
554 and the other 50% showing the opposite regulation (Fig 7H). Therefore during development  
555 astrocyte-neuron communication enacts global gene expression changes in astrocytes, going  
556 beyond synapse-regulating genes.

## 557 **Discussion**

558 In this study we demonstrate how astrocytes and neuronal synapses develop together in the  
559 postnatal brain, and how each cell signals to the other to ensure correct development. In  
560 particular, we show that: • Astrocytes are unevenly distributed across the visual cortex,  
561 constituting more than 50% of all cells in L1, and about 10% of all cells in L2-6. • Astrocyte  
562 transcriptome changes during development are correlated to expression changes in synaptic  
563 proteins. • Astrocytes form heterogeneous populations in the developing cortex, based on their  
564 spatial location. • Expression of select synapse-regulating genes (*Gpc4*, *Gpc6* and *Chrd11*) is  
565 differentially regulated during development at both temporal and spatial levels. • Expression of  
566 astrocyte synapse-regulating genes is affected by changes in thalamic neuronal activity and  
567 astrocyte calcium activity. • Neuronal and astrocyte activity regulate multiple non-overlapping  
568 genetic programs in astrocytes, demonstrating effects beyond synapse regulation.

### 569 Astrocyte number and transcriptome alterations across development coincide with stages of 570 synapse development

571 In the mouse cortex astrocytes begin to be generated right before birth and populate the cortex  
572 throughout the first month of life (Farhy-Tselnicker and Allen, 2018; Ge et al., 2012). During this  
573 time many changes are occurring in astrocytes, as well as in the synapses between neighboring  
574 neurons. We observed that the most significant change in astrocytes at the transcriptome level  
575 occurred between the first and second postnatal weeks (Fig 2). Similarly, an analysis of the  
576 synaptic proteome during development showed the largest difference between P9 and P15  
577 (Gonzalez-Lozano et al., 2016), suggesting similar or overlapping regulatory mechanisms in both  
578 astrocytes and neurons. Our in-depth analysis of the developmental changes in the expression  
579 levels of the major components of glutamatergic synapses, presynaptic VGlut1, 2 and  
580 postsynaptic GluA1, 2 (Fig 1) revealed divergent expression profiles. While VGlut1 and GluA2 are  
581 strongly upregulated between the first and second postnatal weeks, VGlut2 and GluA1 exhibit a  
582 more gradual increase. This suggests different regulatory mechanisms at the level of individual  
583 pre- and post-synaptic proteins. Our observations fit with previous reports showing calcium-  
584 permeable AMPARs such as GluA1-containing are associated with immature synapses and  
585 expressed earlier than GluA2, which is inserted into the synapse at later ages marking a mature  
586 synapse (Brill and Huguenard, 2008).

587  
588 In addition to the transcriptomic changes astrocyte numbers are also strongly regulated during  
589 development. Highly proliferative for the first two postnatal weeks (Ge et al., 2012), astrocytes  
590 rapidly expand and populate the entire cortex, peaking in numbers at P21 (Fig 1), showing a ~5-  
591 60 fold increase in numbers across the visual cortex at P21 compared to P1 (Table S1). Indeed,  
592 genes upregulated at P14 are uniquely enriched in GO terms related to cell proliferation and  
593 migration (Table S2B). Interestingly, the density of astrocytes remains fairly constant throughout  
594 development, suggesting their expansion rate is correlated with the overall expansion of the  
595 cortex. The mechanisms that regulate these migration patterns are still unknown, and seem to be  
596 largely unaffected by neuronal or astrocyte activity, as evident from the similar numbers of  
597 astrocytes within each cortical layer in both neuronal and astrocyte activity manipulation models  
598 tested here (Fig S4, S5). Future studies will determine the factors, or sets of factors that regulate  
599 the number and location of astrocytes within defined domains.

### 600 Developmental expression of astrocyte genes is regulated by both neuronal and astrocyte activity

601  
602 Ever since the astrocyte-derived factors that promote synapse formation were identified, an  
603 outstanding question in the field has been, how are they regulated (Baldwin and Eroglu, 2017;  
604 Farhy-Tselnicker and Allen, 2018)? Is it an astrocyte-intrinsic process, or is it affected/driven by  
605 changes in neuronal activity which occur as synapses develop? Our *in vitro* work together with  
606 previously published studies has provided evidence that neuronal activity can influence astrocyte  
607

608 gene expression and function at the synapse (Fig S4A, (Benediktsson et al., 2012; Bernardinelli  
609 et al., 2014b; Durkee and Araque, 2019; Hasel et al., 2017)). However, whether neuronal activity  
610 regulates astrocytes in the developing brain *in vivo* has not been systematically addressed. Here,  
611 silencing thalamic neurons that project to the VC by knocking out VGlut2 resulted in attenuation  
612 of the developmental expression changes in astrocyte genes, as well as AMPAR subunits, at P14  
613 but not at P7. This suggests a delay in circuit maturation, similar to other studies employing visual  
614 deprivation methods, and observing delayed maturation of VC neurons (Albanese et al., 1983;  
615 Desai et al., 2002; Freire, 1978; Funahashi et al., 2013; Ishikawa et al., 2014; Ko et al., 2014),  
616 and astrocyte morphology (Müller, 1990; Stogsdill et al., 2017). Furthermore, this regulation goes  
617 beyond synapse development, as snRNAseq analysis identified many genes differentially  
618 expressed by astrocytes in VGlut2 cKO mice which are related to additional cellular processes.  
619 Notably, VGlut2 cKO did not affect the levels of VGlut1 (Fig 4; (Wallén-Mackenzie et al., 2010)),  
620 which marks cortico-cortical connections, suggesting the normal upregulation in VGlut1 that  
621 occurs at P14 is either intrinsic to the cortical neurons, and/or regulated by other mechanisms  
622 than dLGN-VC evoked activity.

623  
624 Our study revealed an additional important layer of regulation of astrocyte expression of Gpc4  
625 and Chrd11, and that is by Ip3r2-mediated astrocyte calcium activity (Petraovic et al., 2014;  
626 Srinivasan et al., 2015). Interestingly, silencing the ability of astrocytes to increase intracellular  
627 calcium by knocking out Ip3r2 resulted in an opposite regulation of gene expression to the ones  
628 observed in the VGlut2 cKO mice, and did not correspond to layer-specific developmental  
629 changes, suggesting a more global role of astrocyte calcium activity in the regulation of Gpc4 and  
630 Chrd11 gene expression. Notably, Gpc6 expression was unaltered in Ip3r2 KO VC at P14,  
631 suggesting distinct regulation of expression of the two glypican family members. snRNAseq  
632 analysis identified many additional genes regulated by astrocyte calcium activity, both synapse  
633 and non-synapse related, however these weren't correlated with developmental changes. These  
634 results suggest that astrocyte Ca<sup>2+</sup> activity is an important intrinsic mechanism for regulating  
635 developmental gene expression, but is not tied to changes occurring following eye opening.

636  
637 Astrocytes form diverse populations in the developing mouse visual cortex  
638 The diversity of neurons based on location, morphology, connectivity and activity patterns has  
639 been extensively studied for decades, with multiple subtypes of excitatory and inhibitory neurons  
640 identified (Kepecs and Fishell, 2014; Migliore and Shepherd, 2005; Zeisel et al., 2015). For a long  
641 time cortical protoplasmic astrocytes were viewed as a homogeneous population. However recent  
642 studies investigating astrocyte heterogeneity using both bulk and single-cell sequencing have  
643 shown that within the cortex, astrocytes are also heterogeneous (Batiuk et al., 2020; Bayraktar  
644 et al., 2020; Lanjakornsiripan et al., 2018). Unlike neurons, astrocytes do not fall into the 6-layer  
645 categories, but rather exist on a gradient of transcriptomically separable yet overlapping groups.  
646 Indeed, our snRNAseq data shows that the biggest differences are between astrocytes of the  
647 upper and deep layer groups (L1-2/3 vs L5-6), while upper and mid-layer groups (L1-2/3-L2/3-5)  
648 are the most similar. Nevertheless, we have identified several astrocyte population marker genes  
649 (such as Dcc, Siah3 or Kcnd2; Fig 6), that are significantly enriched in one group over others. In  
650 the future, these could be used to target specific populations of astrocytes, similar to the methods  
651 employed for neurons, in order to manipulate astrocytes that interact with specific synapse types  
652 or circuits. Importantly, while blocking thalamo-cortical activity did alter the expression of  
653 numerous genes in astrocytes, it did not alter the layer patterning of the cells, showing that this is  
654 not a major factor in driving layer-enriched gene expression. Indeed altering the identity of local  
655 cortical neurons by using Dab1 KO mice, in which cortical layer neurons are reversed, does alter  
656 astrocyte layer identity, suggesting a role for local cues (Lanjakornsiripan et al., 2018). Our  
657 findings further suggest that neuronal activity acts to fine-tune the level of astrocyte genes that  
658 are important for neuronal function, rather than determining their presence or absence.



659  
660 Interestingly some of the synapse-regulating genes we profiled display layer-specific expression  
661 changes across development (Fig 3). We found a correlation between *Chrdl1* upregulation in the  
662 upper layers with that of *GluA2*, consistent with our previous findings regarding *Chrdl1* regulation  
663 of *GluA2* levels (Blanco-Suarez et al., 2018). A more complex picture emerges for *Gpc4*, *Gpc6*,  
664 and *GluA1*, the AMPAR subunit regulated by these genes (Allen et al., 2012), as they do not show  
665 such correlation in their expression patterns. *GluA1* protein levels steadily increase across  
666 development, peaking in most layers at P7, and do not show downregulation at P14 in L1 (as was  
667 observed for *Gpc4*), or upregulation in deeper layers (as was shown for *Gpc6*). Still, changes in  
668 *Gpc4* expression are contributing to the levels of *GluA1*, as *GluA1* is affected in correlation with  
669 changes in *Gpc4* expression in the neuronal and astrocyte activity deficit models (Figs 4,5), and  
670 *GluA1* levels are reduced in the VC of *Gpc4* KO mice (Farhy-Tselnicker et al., 2017). One  
671 possibility is that *Gpc4* and *Gpc6* may regulate *GluA1* levels at specific synapses, such as  
672 glutamatergic terminals onto interneurons in L1, or deep layer cortical neurons, making it hard to  
673 distinguish their specific effect when analyzing synapses as a group.

674  
675 This study demonstrates that the correct formation of synapses and hence neuronal circuit  
676 connectivity depends on precise communication between neurons and astrocytes, where  
677 disruption in one cell type leads to disruption in the other and an overall dysregulation of synapse  
678 formation. It further shows that astrocyte regulation of synapses is intimately linked to  
679 environmental changes. Thus, an image of astrocyte identity emerges as highly plastic and  
680 dynamic cells, actively perceiving and responding to their environment. Future studies to  
681 determine the precise nature of astrocyte plasticity and to further distinguish intrinsic and extrinsic  
682 influences on these cells will give insight into their function in both health and disease.

683 **ACKNOWLEDGEMENTS**

684 We thank members of the Allen lab for helpful discussions on the project. This work was supported  
685 by NIH NINDS grants to N.J.A: NS105742 and NS089791. Work in the lab of N.J.A. is supported  
686 by the Hearst Foundation, the Pew Foundation, and the CZI Neurodegeneration Network. This  
687 work was supported by Core Facilities of the Salk Institute (Next Generation Sequencing,  
688 Bioinformatics, Biophotonics: NIH NCI CCSG P30 014195, the Waitt, Helmsley and Chapman  
689 Foundations). J.R.E is an Investigator of the Howard Hughes Medical Institute.

690

691 **AUTHOR CONTRIBUTIONS**

692 I.F.-T. and N.J.A conceived the project, designed experiments, analyzed data and wrote the  
693 manuscript, with input from other authors. I.F.-T., M.M.B., C.D., E.B-S. performed experiments  
694 and analyzed data. C.F., H.L., G.A.E. analyzed data, with supervision from M.S. and J.R.E.

695

696 **DECLARATION OF INTERESTS**

697 The authors declare no competing interests.

698

699 **SUPPLEMENTAL INFORMATION**

700 Supplemental information includes seven figures and six tables.

701 **Supplemental Table Legends**

702 **Table S1 (related to Figures 1, S1). Development of astrocytes and synapses in the mouse**  
703 **visual cortex.** Full statistical analysis of astrocyte numbers, VGlut1, VGlut2, GluA1, and GluA2  
704 changes during development. Each comparison (e.g. astrocyte number/area, comparison  
705 between ages within each layer) are labeled accordingly. Statistical comparison between ages  
706 within each layer (top), as well as between layers at each age (bottom) are shown.

707  
708 **Table S2 (related to Figures 2, S2). Determination of the astrocyte transcriptome across**  
709 **visual cortex development. A.** Complete list of genes (expression levels shown as FPKM) at  
710 each developmental stage as indicated. Expression levels for each sample, as well as average  
711 are shown, as well as pairwise analysis and FDR values. **B.** Complete list of GO terms (Biological  
712 Process) identified for astrocyte enriched genes at each developmental time point as indicated.

713  
714 **Table S3 (related to Figures 3, S3). Synapse-regulating genes in astrocytes show**  
715 **differential spatio-temporal expression. A.** Full statistical analysis of developmental changes  
716 in mRNA expression of selected synapse regulating genes by smFISH. Averages and analysis  
717 calculated for N=3, i.e. per mouse. **B.** Full statistical analysis of developmental changes in mRNA  
718 expression of selected synapse regulating genes by smFISH. Averages and analysis calculated  
719 for n~50-350, i.e. total number of astrocytes per group (across the 3 mice). Statistical  
720 comparison between ages within each layer (top), as well as between layers at each age (bottom)  
721 are shown.

722  
723 **Table S4 (related to Figures 4, S4, 5, S5). Neuronal and astrocyte activity regulate astrocyte**  
724 **expression of synapse regulating genes. A.** Full statistical analysis of mRNA expression  
725 differences between WT and KO in VGlut2 and Ip3r2 models. Averages and analysis calculated  
726 for N=5, i.e. per mouse. **B.** Full statistical analysis of mRNA expression differences between WT  
727 and KO in VGlut2 and Ip3r2 models. Averages and analysis calculated for n~200-400, i.e. total  
728 number of astrocytes per group (across 5 mice). All comparisons are between WT and KO within  
729 each layer.

730  
731 **Table S5 (related to Figures 6, S6). Unbiased determination of astrocyte layer-enriched**  
732 **genes. A.** Complete list of DEGs identified in pairwise analysis between astrocyte layer groups  
733 for VGlut2 WT dataset. **B.** Complete list of DEGs identified in pairwise analysis between astrocyte  
734 layer groups for Ip3r2 WT dataset. **C.** Complete list of GO terms (Biological Process) identified  
735 for astrocyte layer group enriched genes for the VGlut2 WT dataset.

736  
737 **Table S6 (related to Figures 7, S7). Global astrocyte gene expression changes following**  
738 **silencing of neuronal or astrocyte activity. A.** Complete list of DEGs between WT and KO for  
739 each model, VGlut2 and Ip3r2. **B.** Complete list of genes common to KO/WT DEGs and layer  
740 group enriched DEGs identified for the WT. **C.** Complete list of genes common to KO/WT DEGs  
741 and developmentally regulated genes (P14/P7 DEGs) identified in bulk RNAseq. **D.** Complete list  
742 of GO terms (Biological Process) identified for DEGs between WT and KO (VGlut2, Ip3r2), as well  
743 as terms identified for DEGs common to both models.

## 744 METHODS AND MATERIALS

745

### 746 ANIMALS

747 All animal work was approved by the Salk Institute Institutional Animal Care and Use Committee.

748 **Rats:** Sprague Dawley rats (Charles Rivers) were maintained in the Salk Institute animal facility,  
749 under a 12 hour light:dark cycle with ad libitum access to food and water. Rat pups (both male  
750 and female) were used at postnatal day (P) 1-2 for preparation of primary cortical astrocyte  
751 cultures, and at P5-P7 for preparation of purified immunopanned retinal ganglion cell (RGC)  
752 neuronal cultures.

753 **Mice:** Mice were maintained in the Salk Institute animal facility, under a 12 hour light:dark cycle  
754 with ad libitum access to food and water. Both male and female mice were used for experiments.  
755 The following mouse lines were used:

756 **Wild-type (WT; C57Bl6/J)** were purchased from Jackson Labs and bred in-house (Jax #000664).  
757 Mice were used for breeding and backcrossing, and as non-littermate controls.

758 **Ribotag floxed (B6N.129-Rpl22tm1.1Psam/J)** were obtained from Jackson Labs (Jax  
759 #011029). Mice were maintained as homozygous for floxed Rpl22 on C57Bl6/J background, and  
760 crossed to mice expressing cre recombinase for experiments.

761 **Gfap-cre (B6.Cg-Tg (Gfap-cre)73.12Mvs/J)** mice were obtained from Jackson Labs (Jax  
762 #012886), and bred in house to generate cre<sup>+</sup> females.

763 *To generate Astrocyte-ribotag mice* homozygous flox-Rpl22-HA males were crossed to Gfap-cre  
764 hemizygous females. Male mice hemizygous for cre and heterozygous for flox-Rpl22-HA (Rpl22-  
765 HA<sup>+</sup>; Gfapcre<sup>+</sup>) were used for all experiments.

766 **Aldh11-GFP (Tg(Aldh111-EGFP)OFC789Gsat/Mmucd)** were obtained from MMRRRC. They  
767 were backcrossed to C57Bl6/J background (Jax: 000664) for at least 4 generations prior to  
768 conducting experiments.

769 **VGlut2 floxed (Slc17a6tm1Lowl/J)** were obtained from Jackson Labs (Jax #012898). Mice were  
770 maintained as homozygous for floxed VGlut2 on a C57Bl6/J background, and crossed to mice  
771 expressing cre recombinase for experiments.

772 **ROR $\alpha$ -IRES-Cre** were obtained from Dennis O'Leary at the Salk Institute, and described in (Chou  
773 et al., 2013) and (Farhy-Tselnicker et al., 2017). Mice were backcrossed to C57Bl6/J (Jax  
774 #000664) for 3-4 generations before being crossed to the VGlut2 flox line. Expression of cre  
775 recombinase in the thalamus was confirmed by crossing the ROR $\alpha$  cre mouse with a tdTomato  
776 reporter mouse line (Jax #007914) (Fig 4A).

777 *To generate conditional VGlut2 KO mice* for experiments, VGlut2<sup>ff</sup>;cre-ve females were bred to  
778 VGlut2<sup>ff</sup>;ROR $\alpha$  cre positive males. Homozygous VGlut2 flox;ROR $\alpha$  cre positive littermates were  
779 compared with homozygous VGlut2 flox;ROR $\alpha$  cre -ve in each experiment.

780 *To generate het and homozygous VGlut2 cKO mice expressing a fluorescent reporter in the*  
781 *recombined neurons* (Fig 4, S4), VGlut2<sup>ff/+</sup>;ROR $\alpha$  cre positive; tdTomato positive males were  
782 crossed to VGlut2<sup>ff</sup> females. As control in these experiments, ROR $\alpha$  cre positive mice were  
783 crossed to tdTomato positive, to generate VGlut2<sup>+/+</sup>ROR $\alpha$ ;cre positive; tdTomato positive mice.

784 **IP3R2 KO** was obtained from Ju Chen lab at UCSD (Li et al., 2005) and maintained on C57Bl6/J  
785 background, either as KO x KO breeding scheme, or het x het breeding scheme. Both littermate  
786 and non-littermate pairs of WT and KO mice were used for experiments. For non-littermate pairs,  
787 C57Bl6/J that were bred in-house were used as control.

788 In all cases, when littermates could not be used as control, mice were matched by age, size, fur  
789 color and condition, and eye opening to ensure identical developmental stage.

### 790 Mouse Tissue collection.

791 Tissue was collected at the following developmental time points: post-natal day (P) 1, P4, P7,  
792 P14, P21, P28, and P120.

793 **Ribotag RNAseq:** All mice were collected between 9:30am and 12:30pm on the day of  
794 experiment. Mice were anesthetized by I.P. injection of 100 mg/kg Ketamine (Victor Medical

795 Company)/20 mg/kg Xylazine (Anased) mix, and transcardially perfused with 10ml PBS then 10ml  
796 1% PFA. Brains were dissected in 2.5mM HEPES-KOH pH 7.4, 35mM glucose, 4mM NaHCO<sub>3</sub>  
797 in 1x Hank's Balanced Salt Solution with 100µg/ml cycloheximide added fresh (Heiman et al.,  
798 2014). Brains were cut at approximately bregma -2.4 to isolate the visual cortex, the cortex was  
799 carefully detached from the subcortical areas, and any visible white matter was removed. Lateral  
800 cuts were made at 1mm and 3mm from the midline to further isolate the VC section, and Ribotag  
801 pulldown was immediately performed. For each time point the visual cortices from 2 mice (Rpl22-  
802 HA+; Gfap cre+) were pooled for RNA isolation and RNA sequencing library preparation. P7 = 3  
803 biological replicates (6 mice, 2 x 3); P14 = 4 biological replicates (8 mice, 2 x 4); P28 = 5 biological  
804 replicates (10 mice, 2 x 5); P120 = 6 biological replicates, 3 new samples (6 mice, 2 x 3), plus for  
805 data analysis 3 additional P120 biological replicates from a previously published study from the  
806 lab (Boisvert et al 2018; GEO GSE99791), collected and processed in the same way, were  
807 included to increase the power of the analysis.

808 **Histology (smFISH In situ hybridization and Immunostaining):** Mice aged P4 and older were  
809 anaesthetized by I.P. injection of 100 mg/kg Ketamine (Victor Medical Company)/20 mg/kg  
810 Xylazine (Anased) mix and transcardially perfused with PBS, then 4% PFA at room temp. Brains  
811 were removed and incubated in 4% PFA overnight at 4C, then washed 3X 5 min with PBS, and  
812 cryoprotected in 30% sucrose for 2-3 days, before being embedded in TFM media (General data  
813 healthcare #TFM-5), frozen in dry ice-ethanol slurry solution, and stored at -80C until use. P1  
814 mice were decapitated and brains removed without perfusion, briefly washed in PBS and put in  
815 4% PFA overnight at 4C, followed by a similar procedure as described above for older mice.  
816 Brains were sectioned using a cryostat (Hacker Industries #OTF5000) in sagittal or coronal  
817 orientations depending on experimental needs at a slice thickness of 16-25 µm. Sections were  
818 mounted on Superfrost plus slides (Fisher #1255015). Immunostaining for synaptic markers and  
819 smFISH were performed on the same day of sectioning. 3-5 mice were used for each  
820 experimental group. For each mouse, 3 sections were imaged and analyzed.

821 **Single nucleus RNAseq and Western blot:** Mice were anesthetized by I.P. injection of 100  
822 mg/kg Ketamine (Victor Medical Company)/20 mg/kg Xylazine (Anased) mix, then decapitated.  
823 Brains were rapidly removed and the visual cortex dissected in ice-cold PBS using the same  
824 coordinates as described for Ribotag RNAseq. Dissected cortices were snap frozen, and kept at  
825 -80C until use. For snRNAseq, 4 mice were collected for each experimental group. For Western  
826 blot, 2-4 independent experiments/samples for each condition were analyzed.

827

## 828 **RNAseq**

### 829 **Bulk RNAseq using Ribotag**

830 **Ribotag pulldown:** A modified Ribotag protocol was performed to isolate astrocyte enriched  
831 RNA. Briefly, brain samples were homogenized using a Dounce homogenizer (Sigma #D9063) in  
832 2ml cycloheximide-supplemented homogenization buffer (1% NP-40, 0.1M KCl, 0.05M Tris, pH  
833 7.4, 0.012M MgCl<sub>2</sub> in RNase free water, with 1:1000 1M DTT, 1mg/mL heparin, 0.1mg/mL  
834 cycloheximide, 1:100 Protease inhibitors, and 1:200 RNasin added fresh). Homogenates were  
835 centrifuged and the supernatant incubated on a rotator at 4°C for 4 hours with 5ul anti-HA antibody  
836 to bind the HA-tagged ribosomes (CST Rb anti-HA #3724, 1:200). Magnetic IgG beads (Thermo  
837 Scientific Pierce #88847) were conjugated to the antibody-ribosome complex via overnight  
838 incubation on a rotator at 4°C. Samples were washed with a high salt buffer (0.333M KCl, 1%  
839 NP40, 1:2000 1M DTT, 0.1mg/mL cycloheximide, 0.05M Tris pH 7.4, 0.012M MgCl<sub>2</sub> in RNase-  
840 free water), and RNA released from ribosomes with 350ul RLT buffer (from Qiagen RNeasy kit)  
841 with 1% BME. RNA was purified using RNeasy Plus Micro kit (Qiagen 74034) according to  
842 manufacturer instructions and eluted into 16ul RNase-free water. Eluted RNA was stored at -  
843 80°C. For each time point, 50ul of homogenate (pre- anti-HA antibody addition) was set aside  
844 after centrifugation, kept at -20°C overnight, and purified via RNeasy Micro kit as an 'input'  
845 sample, and used to determine astrocyte enrichment.

846 **Library generation and sequencing:** RNA quantity and quality were measured with a Tape  
847 Station (Agilent) and Qubit Fluorimeter (ThermoFisher) before library preparation. >100ng of RNA  
848 was used to make libraries. mRNA was extracted with oligo-dT beads, capturing polyA tails, and  
849 cDNA libraries made with Illumina TruSeq Stranded mRNA Library Preparation Kit (RS-122-2101)  
850 by the Salk Institute Next Generation Sequencing (NGS) Core. Samples were sequenced on an  
851 Illumina HiSeq 2500 with single-end 50 base-pair reads, at 12-70 million reads per sample.

852 **RNA sequencing mapping, analysis, and statistics:** Raw sequencing data was demultiplexed  
853 and converted into FASTQ files using CASAVA (v1.8.2), and quality tested with FASTQC v0.11.2.  
854 Alignment to the mm10 genome was performed using the STAR aligner version 2.5.1b (Dobin et  
855 al., 2013). Mapping was carried out using default parameters (up to 10 mismatches per read, and  
856 up to 9 multi-mapping locations per read), and a high ratio of uniquely mapped reads (>75%) was  
857 confirmed with exonic alignment inspected to ensure that reads were mapped predominantly to  
858 annotated exons. Raw and normalized (FPKM) gene expression was quantified across all genes  
859 (RNAseq) using the top-expressed isoform as a proxy for gene expression using HOMER v4.10  
860 (Heinz et al., 2010), resulting in 10-55 million uniquely mapped reads in exons. Principal  
861 Component Analysis was carried out with prcomp in R 3.4.3 on normalized counts. Differential  
862 gene expression was carried out using the DESeq2 (Love et al., 2014) package version 1.14.1  
863 using the HOMER getDiffExpression.pl script with default normalization and using replicates to  
864 compute within-group dispersion. Significance for differential expression was defined as adjusted  
865  $P < 0.05$ , calculated using Benjamini-Hochberg's procedure for multiple comparison adjustment.

866 Significantly altered genes are presented in 3 categories:

867 *All genes:* FPKM >1, adjusted  $p < 0.05$

868 *Astrocyte-expressed genes:* ribotag pulldown (astrocyte)/input (all cells) >0.75, FPKM >1,  
869 adjusted  $p < 0.05$

870 *Astrocyte-enriched genes:* ribotag pulldown (astrocyte)/input (all cells) >3, FPKM >1, adjusted  
871  $p < 0.05$

872 See also (Boisvert et al., 2018).

873 **GO enrichment analysis:** GO terms that are enriched in astrocytes at each developmental stage,  
874 were identified using the String database (<https://string-db.org/>) (Szklarczyk et al., 2019). A search  
875 using multiple proteins by gene name was performed with the default parameters, and GO  
876 Biological Process category selected and exported from the analysis tab. GO terms with gene  
877 ratio above 0.5 were selected, and plotted for each age group using dot charts (function dotchart  
878 in R), with x-axis showing the ratio of genes overlapping with each GO term, and dot size is the  
879 significance of the overlap (adj. P value). GO terms common to all age groups were obtained  
880 using the Venn Diagram (<http://www.interactivenn.net/>) (Heberle et al., 2015), and terms with  
881 gene ratio above 0.5 were selected, and plotted using dot charts. A full list of GO terms is  
882 presented in Table S2B.

883

### 884 **Single nucleus RNAseq**

885 **Sample preparation:** A total of 8 samples (2 for VGlut2 WT, 2 for VGlut2 cKO, 2 for Ip3r2 WT, 2  
886 for Ip3r2 KO) were sequenced to obtain the dataset described in Figs 6-7. The samples were as  
887 follows: VGlut2 WT\_1; VGlut2 cKO\_1; VGlut2 WT\_2; VGlut2 cKO\_2; Ip3r2 WT\_1; Ip3r2 KO\_1;  
888 Ip3r2 WT\_2; Ip3r2 KO\_2. Each group consisted of 1 replicate from male mice and 1 replicate from  
889 female mice. Each replicate consisted of the VC from both hemispheres of 2 mice of the same  
890 genotype and gender. Nuclear isolation, FACS sorting, 10x Barcoding and cDNA preparation  
891 were performed on the same day using 1 WT and KO pair, that were processed in parallel,  
892 resulting in 4 separate procedures. cDNA was stored at -20C until all samples were collected.  
893 Library preparation and sequencing were carried out at the same time for all 8 samples.

894 **Nuclei preparation:** Nuclei were isolated from frozen visual cortex tissue. Tissue was manually  
895 homogenized using a 2 step Dounce homogenizer (A and B) (Sigma #D9063) in NIMT buffer,  
896 containing (in mM: 250 Sucrose, 25 KCl, 5 MgCl<sub>2</sub>, 10 Tris-Cl pH 8, 1 DTT; 1:100 dilution of: Triton

897 X100, Protease Inhibitor Cocktail (Sigma #P8340); and 1:1000 dilution of: RNaseOUT™  
898 Recombinant Ribonuclease Inhibitor (Thermo #10777019); SUPERase• In™ RNase Inhibitor  
899 (Thermo #AM2694)) on ice. Homogenized samples were mixed with 50% Iodixanol (OptiPrep™  
900 Density Gradient Medium (Sigma #D1556)) and loaded onto 25% Iodixanol cushion, and  
901 centrifuged at 10,000g for 20 min at 4C in a swinging bucket rotor (Sorval HS-4). Pellets  
902 resuspended in ice-cold DPBS (HyClone) with 1:1000 dilution of: RNaseOUT™ Recombinant  
903 Ribonuclease Inhibitor (Thermo #10777019); SUPERase• In™ RNase Inhibitor (Thermo  
904 #AM2694). Nuclei were then incubated for 7 min on ice with Hoechst 33342 Solution (20 mM)  
905 (Thermo #62249) (final concentration 0.5µM), followed by centrifugation at 1000g for 10min at 4C  
906 to pellet nuclei. Pellets were resuspended in blocking buffer containing DPBS with RNase  
907 inhibitors, and 1:10 dilution of pure BSA, and blocked for 30min on ice. Neun-Alexa488 pre-  
908 conjugated antibody (Millipore #MAB377X) was then added at 1:1000 dilution, and incubated for  
909 at least 1 hr on ice before proceeding to Flow cytometry sorting.

910 **Flow cytometry:** Fluorescence-Activated Nuclei Sorting (FANS) was performed in the Salk  
911 Institute Flow Cytometry core using a BD FACS Aria Fusion sorter with PBS for sheath fluid (a  
912 100-µm nozzle was used for these experiments with sheath pressure set to 20 PSI). Hoechst-  
913 positive nuclei were gated first (fluorescence measured in the BV421 channel), followed by  
914 exclusion of debris using forward and side scatter pulse area parameters (FSC-A and SSC-A),  
915 exclusion of aggregates using pulse width (FSC-W and SSC-W), before gating populations based  
916 on NEUN fluorescence (using the FITC channel). To isolate the non-neuronal cell population,  
917 nuclei devoid of FITC signal (Neun-) were collected (Fig 6A). Nuclei were purified using a 1-drop  
918 single-cell sort mode (for counting accuracy); these were directly deposited into a 1.5 ml  
919 eppendorf without additional buffer (to yield a sufficient concentration that permitted direct loading  
920 onto the 10x chip).

921 Sorted NeuN-negative nuclei were immediately processed with 10x Chromium kit (10x Genomics)  
922 for single nucleus barcoding. Nuclei were kept on ice for the entire process. At each time, WT and  
923 KO samples were processed in parallel on the same day.

924 **10x Chromium barcoding, library preparation and sequencing:** Single nuclei separation,  
925 barcoding, and cDNA generation were performed following the manufacturer's instruction using  
926 the Chromium single cell 3' kit (V3, 10x genomics PN-1000073). cDNA concentration and quality  
927 were measured using Qubit Fluorimeter (ThermoFisher) and Tape Station (Agilent) respectively,  
928 and was stored at -20C until library preparation.

929 Libraries were generated from all samples at the same time (8 total samples, 2 WT/2 KO  
930 Vglut2cKO model; 2 WT/2KO IP3R2 KO model) following manufacturer's instructions using the  
931 Chromium single cell 3' kit (V3, 10x genomics PN-1000075). Library quality was assessed with a  
932 Tape station (Agilent). NovaSeq sequencing was performed at the UCSF Center for Advanced  
933 Technology, at ~300 million reads/ sample (60,000 reads/cell).

934 **Single-cell RNA-seq Data Preprocessing and Clustering:** Data was demultiplexed and  
935 mapped onto the mouse genome (mm10) using 10X Cellranger (v3.1.0) with default parameters.  
936 Cell barcodes with < 200 genes detected were discarded due to low coverage. Doublets were  
937 identified and removed using Scrublet (Wolock et al., 2019) with its default setting in each sample.  
938 The average number of UMIs per cell was 2310 +/- 878; average number of genes detected per  
939 cell (UMI >= 1) was 1168 +/- 328. Cell clusters were identified using Scanpy (v1.4.3), following  
940 the clustering process described in (Luecken and Theis, 2019). All the samples were combined  
941 and used the top 5000 highly variable genes as the input dimension reduction. To identify clusters,  
942 Scanorama (v1.0.0, default parameter, k=20) (Hie et al., 2019) was used to perform batch  
943 correction and dimension reduction (30 PCs), followed by Leiden clustering (Traag et al., 2019)  
944 (resolution = 1). Data was visualized using the UMAP embedding (McInnes et al., 2018) function  
945 from Scanpy. The ensemble clustering identified all astrocytes as one cluster, to further identify  
946 astrocytes subtypes, we repeated the same clustering process on the astrocytes cluster only and  
947 got four subtypes. Astrocyte clusters were annotated using cell-type marker genes identified from

948 previous studies to label distinct cortical astrocyte populations (Bayraktar et al., 2020;  
949 Lanjakornsiripan et al., 2018; Marques et al., 2016; Tasic et al., 2018; Van Hove et al.; Zeisel et  
950 al., 2018).

951 **Identifying Differential Expressed Genes (DEG):** To identify cluster-specific DEGs, we used  
952 the `scanpy.tl.rank_gene_groups` function to perform the Wilcoxon rank-sum test with Benjamini-  
953 Hochberg correction to compare cells from each cluster with the remaining cells. Genes with FDR  
954 < 0.1 and log<sub>2</sub> fold change between -0.15 and 0.15 were identified as DEGs. To identify DEGs  
955 between KO and WT, we performed the same analysis using combined astrocyte clusters. All  
956 comparisons were performed separately for VGlut2 cKO, and Ip3r2 KO samples.

957 **GO enrichment analysis:** GO terms that are enriched in astrocyte gene groups within each  
958 cluster, as well as genes regulated by neuronal or astrocyte activity, were identified using the  
959 String database (<https://string-db.org/>) (Szklarczyk et al., 2019). A search using multiple proteins  
960 by gene name was performed separately on VGlut2 cKO and Ip3r2 KO samples, and up- and  
961 down-regulated DEGs, using the default parameters, and GO Biological Process category  
962 selected and exported from the analysis tab. A maximum of 25 GO terms (with lowest adj. p-  
963 value) were selected, and plotted for each model using dot charts (function `dotchart` in R), with x-  
964 axis showing the ratio of genes overlapping with each GO term, and dot size is significance of the  
965 overlap (adj. p-value). GO terms common to both models were obtained using the Venn Diagram  
966 (<http://www.interactivenn.net/>) (Heberle et al., 2015), and plotted using dot charts. A full list of GO  
967 terms is presented in Tables S5C, S6D.

968

## 969 CELL CULTURE

970 **Retinal Ganglion Cell (RGC) neuron purification and culture:** RGC purification and culture  
971 was performed as described (Allen et al., 2012; Ullian et al., 2001; Winzeler and Wang, 2013).  
972 Briefly, retinas from P5-P7 rat pups of both sexes were removed and placed in DPBS (HyClone  
973 #SH30264). Retinas were digested with Papain (Worthington #PAP2 3176; 50 units) for 30 min  
974 at 34C, triturated with Low OVO (15 mg/ml trypsin inhibitor (Worthington #LS003086)), then High  
975 OVO (30 mg/ml trypsin inhibitor (Worthington #LS003086)) solutions. The cell suspension was  
976 then added to lectin (Vector #L-1100) coated Petri dishes to pull down microglia and fibroblast  
977 cells for 5-10 min at room temp. The remaining cells were then added to T11D7 hybridoma  
978 supernatant coated petri dishes for 40 min at room temp, which specifically binds RGCs. After  
979 washing off the non-binding cells with DPBS, pure RGCs were released by trypsin treatment  
980 (Sigma #T9935) to cleave cell-antibody bond, and collected. RGCs were plated on 6-well plates  
981 coated with PDL (Sigma # P6407) and laminin (Cultrex Trevigen #3400-010-01) at a density of  
982 125,000 cells/well. RGCs were maintained in the following media: 50% DMEM (Life tech  
983 #11960044); 50% Neurobasal (Life Tech #21103049); Penicillin-Streptomycin (LifeTech #15140-  
984 122); glutamax (Life Tech #35050-061); sodium pyruvate (Life Tech #11360-070); N-acetyl-L-  
985 cysteine (Sigma #A8199); insulin (Sigma #I1882); triiodo-thyronine (Sigma #T6397); SATO  
986 (containing: transferrin (Sigma #T-1147); BSA (Sigma #A-4161); progesterone (Sigma #P6149);  
987 putrescine (Sigma #P5780); sodium selenite (Sigma #S9133)); and B27 (see (Winzeler and  
988 Wang, 2013) for recipe). For complete growth media, the media was supplemented with BDNF  
989 (Peprotech #450-02), CNTF (Peprotech #450-13), and forskolin (Sigma #F6886). The next day,  
990 half of the media was replaced with media containing FUDR (13 µg/µl final concentration Sigma  
991 #F0503) to inhibit fibroblast growth. Cells were fed by replacing half of the media with fresh  
992 equilibrated media every 3-4 days. RGCs were maintained at 37C/10%CO<sub>2</sub> and kept in culture  
993 for at least 7 days prior to treatment to allow for full process outgrowth.

994 **Astrocyte preparation and culture:** Primary astrocytes from rat cortex were prepared as  
995 described (Allen et al., 2012; McCarthy and de Vellis, 1980). Briefly, the cerebral cortex from P1-  
996 P2 rat pups were removed and placed in DPBS (HyClone #SH30264). The meninges and  
997 hippocampi were removed and discarded. The remaining cortices were diced and digested with  
998 Papain (Worthington #LS003126; 330 units) for 1 hr and 15 min in 37C 10% CO<sub>2</sub> cell culture



999 incubator. Cells were triturated in Low OVO and then High OVO containing solutions, and plated  
1000 in PDL coated 75cm tissue culture flasks. 3 days after plating, flasks were manually shaken to  
1001 remove upper cell layers which contained mostly non-astrocytic cells. 2 days after shake off, ARA-  
1002 C (10  $\mu$ M final concentration; Sigma #C1768) was added for 48 hours to inhibit the other  
1003 proliferating cells, which divide faster than astrocytes. Finally, astrocytes were plated in 15 cm  
1004 cell culture plates coated with PDL at 2-3 million cells/dish and passaged once a week. Astrocytes  
1005 were maintained at 37C/10%CO<sub>2</sub> and kept in culture for 3-4 weeks. Astrocyte culture medium  
1006 was DMEM (Life tech #11960044) supplemented with 10% Heat inactivated FBS (LifeTech  
1007 #10437028), Penicillin-Streptomycin (LifeTech #15140-122), glutamax (Life Tech #35050-061),  
1008 sodium pyruvate (Life Tech #11360-070), hydrocortisone (Sigma #H0888), and N-acetyl-L-  
1009 cysteine (Sigma #A8199).

1010 **Treatment of astrocyte cultures with cultured neurons:** Cultured astrocytes were plated on  
1011 cell culture inserts (Falcon #353102) at 250,000 cells/insert. Inserts were added to 6 well plates  
1012 containing either plated RGC neurons (at ~125,000 cells/ well), or empty wells coated with PDL  
1013 and laminin (similar to RGC plated wells), and containing media. Cells were incubated together  
1014 for 4 days in low protein conditioning media containing (50% DMEM, 50% Neurobasal media;  
1015 Penicillin-Streptomycin; Glutamax and sodium pyruvate, NAC, BDNF, CNTF, forskolin), after  
1016 which conditioned media was collected and concentrated 50-fold using 10 kDa cutoff  
1017 concentrators (Sartorius #14558502). Protein concentration was measured using the Bradford  
1018 assay. 3 experimental groups were compared: RGCs alone, astrocytes alone, astrocytes + RGCs.  
1019

## 1020 WESTERN BLOT

1021 Samples were heated in reducing loading dye (Thermo # 39000) for 45 min at 55C. For  
1022 conditioned media, 10  $\mu$ g/ well was loaded; for tissue lysates 20  $\mu$ g/ lane was loaded. Samples  
1023 were resolved on 4-12% bis-tris or bolt gels (Invitrogen #NW04120) for 30-40 min at 150-200V.  
1024 Proteins were transferred to PVDF membranes at 100V for 1 hr, then blocked in 1% casein  
1025 (Biorad #1610782) in TBS (Bioworld #105300272) blocking buffer for 1 hr at room temp on a  
1026 shaker. Primary antibodies were applied overnight at 4C diluted in blocking buffer. The antibodies  
1027 used were: Rb anti-Glypican 4 (Proteintech #13048-1-AP; 1:500), Rb anti IP3R2 (a gift from Ju  
1028 Chen lab, UCSD 1:1000), Ms anti-Tubulin (Thermo #MA5-16308 1:5000). The next day,  
1029 membranes were washed 3X 10 min with TBS-0.1%Tween and the appropriate secondary  
1030 antibody conjugated to Alexa fluor 680 was applied for 2 hrs at room temp (dilution 1:10,000).  
1031 Bands were visualized using the Odyssey Infrared Imager (LiCor) and band intensity analyzed  
1032 using the Image Studio software (LiCor).  
1033

## 1034 HISTOLOGY

1035 **Immunostaining in mouse brain tissue.** The slides containing the sections were blocked for 1  
1036 hr at room temp in blocking buffer containing antibody buffer (100 mM L-lysine and 0.3% Triton  
1037 X-100 in PBS) supplemented with 10% heat-inactivated normal goat serum. Primary antibodies  
1038 diluted in antibody buffer with 5% goat serum were incubated overnight at 4C. The next day slides  
1039 were washed 3X 5 min with PBS with 0.2% Triton X-100 and secondary antibodies conjugated to  
1040 Alexa fluor were applied for 2 hrs at room temp. Slides were mounted with the SlowFade Gold  
1041 with DAPI mounting media (Life Tech #S36939), covered with 1.5 glass coverslip (Fisher  
1042 #12544E) and sealed with clear nail polish. The following antibodies were used: Chk anti GFP  
1043 (Millipore #06-896, 1:500), Rb anti Sox9 (Abcam #ab185966, 1:2000), Rb anti Aldh111 (Abcam  
1044 #ab-87117, 1:500), Rb anti HA (CST #3724), Rb anti S100 $\beta$  (Abcam #ab52642, 1:100), Ms anti  
1045 Neun (Millipore #MAB377), Rb anti NG2 (Millipore # Ab5320), Rb anti MOG (Proteintech # 12690-  
1046 1-ap), Rb anti Iba1 (Wako #016-20001) Gp anti VGlut1 (Millipore #AB5905, 1:2000), Gp anti  
1047 VGlut2 (Millipore #AB2251 1:3000, 1:5000), Rb anti GluA1 (Millipore #AB1504, 1:400), Rb anti  
1048 GluA2 (Millipore #AB1768-I 1:400), Ms anti Bassoon (Enzo #VAMP500, 1:500). All secondary  
1049 antibodies were applied at 1:500 dilution.

1050 The following mouse lines and antibody combinations were used:

| <b>Experiment and figure #</b>                                                              | <b>Mouse line</b>                                                                 | <b>antibodies</b>                    |
|---------------------------------------------------------------------------------------------|-----------------------------------------------------------------------------------|--------------------------------------|
| <b>Astrocyte number across development per layer</b> (Fig 1, S1)                            | Aldh111-GFP                                                                       | GFP, VGlut2                          |
| <b>Cell marker colocalization ribotag validation</b> (Fig 2, S2)                            | Rpl22 f/+; Gfap cre 73.12                                                         | HA, S100b, NeuN, Iba1, NG2, MOG      |
| <b>Astrocyte marker colocalization with Aldh111-Gfp</b> (Fig S1)                            | Aldh111-GFP                                                                       | GFP, sox9, s100b, Aldh111            |
| <b>Pre-synaptic development per layer</b> (Fig 1, S1)                                       | Aldh111-GFP                                                                       | GFP, VGlut1, VGlut2                  |
| <b>Post-synaptic development per layer</b> (Fig 1)                                          | Aldh111-GFP                                                                       | GFP, GluA1, GluA2                    |
| <b>Assessing the presence of thalamic projections to the VC in VGlut2 cKO mice</b> (Fig S4) | VGlut2+/+; tomato+; cre+;<br>VGlut2f/+;tomato+;cre+;<br>VGlut2 f/f; tomato+; cre+ | VGlut2                               |
| <b>Analysis of VGlut1 and VGlut2 signal in VGlut2 cKO mice</b> (Fig 4, S4)                  | VGlut2 f/f<br>VGlut2 f/f;cre+                                                     | VGlut1, VGlut2                       |
| <b>Quantification of pre and postsynaptic puncta, and synapses</b> (Figs 4, S4, 5, S5)      | VGlut2+/+; tomato+; cre+;<br>VGlut2 f/f; tomato+; cre+<br>Ips3r2 WT, Ips3r2 KO    | VGlut1, VGlut, Bassoon, GluA1, GluA2 |

1051  
1052 **Single-molecule fluorescent in situ hybridization (smFISH).** The assay was performed using  
1053 the RNAscope 2.5 HD—multiplex fluorescent Manual Assay kit (ACDbio #320850) using the  
1054 manufacturer's instructions modified for Fixed-frozen tissue. Briefly, slides containing brain  
1055 sections were dried for 1 hr at -20C, then washed for 5 min in PBS at room temp, followed by brief  
1056 wash (~1 min) in 100% Molecular Biology Grade Ethanol. The slides were then air-dried for 5 min,  
1057 and incubated with appropriate pretreatment reagent at 40C. For P1-P7 – protease 3 30min; P14-  
1058 P28 – protease 4 30 min. Slides were then briefly washed with PBS and incubated with target  
1059 probes for 2 hrs at 40C, followed by 3 amplification steps and 1 detection step. Slides were  
1060 mounted using the SlowFade Gold with DAPI mounting media (Life Tech #S36939) covered with  
1061 1.5 glass coverslip (Fisher #12544E) and sealed with clear nail polish.  
1062 All slides were either imaged within 1-2 days, or stored at -20C until imaging.

## 1063 **IMAGING AND ANALYSIS**

### 1064 **Fluorescent microscopy**

1065 All imaging was performed using an Axio Imager.Z2 fluorescent microscope (Zeiss) with the  
1066 apotome module (apotome 2.0), and AxioCam HR3 camera (Zeiss) at 20x magnification. Tile  
1067 images that contain the entire primary visual cortex (from pial surface to white matter tract) were  
1068 acquired. Number of tiles adjusted to contain a similar area of the cortex at each developmental  
1069 stage, typically 1-2(width) X 2-4 (depth) (pixel size 0.3X0.3 μm).

1070 For developmental analysis of astrocyte numbers per layer (Fig 1, S1), presynaptic marker  
1071 analysis during development (Fig 1, S1), VGlut2cKO validation (Fig 4, S4), and Aldh111-GFP  
1072 mouse validation (Fig S1) - z stack images (3 slices, optical slice 1 μm) were obtained.

1073 For Ribotag validation (Fig 2, S2) - Single plane images were obtained.

1074 For In situ hybridization experiments (Fig 3, S3) - z stack images (7 slices, optical slice 1 μm)  
1075 were obtained.

### 1076 **Confocal Microscopy**

1077 **Developmental analysis of GluA1 and GluA2 expression** (Fig 1) slides were imaged using  
1078 Zeiss LSM 700 confocal microscope at 63X magnification. An 1176X1176 pixel 2.7 um thick z  
1079

1080 stack image was obtained (pixel size 0.09X0.09X0.3  $\mu\text{m}$ , 10 slices per 2.7  $\mu\text{m}$  stack). In total 4  
1081 images were taken from each section to encompass all cortical layers. Layers 4-5 were combined  
1082 into 1 image.

1083 **Imaging RORacre-tdTomato+ thalamic projections in the VC** (Fig S4) slides were imaged  
1084 using Zeiss LSM 700 confocal microscope at 63X magnification. A 900 X 900 pixels 2.7  $\mu\text{m}$  thick  
1085 z stack image was obtained (xyz size 0.11X0.11X0.3  $\mu\text{m}$ , 10 slices per 2.7  $\mu\text{m}$  stack). Separate  
1086 images were taken for Layer 1 and Layer 4.

1087 **Imaging synaptic proteins for synapse number analysis** (Figs 4, S4, 5, S5) slides were  
1088 imaged using Zeiss LSM 880 confocal microscope at 63X magnification. For each section, 1420  
1089 X 920 pixels 3.5  $\mu\text{m}$  thick z stack image was obtained (pixel size 0.08X0.08X0.39  $\mu\text{m}$ ; 10 slices  
1090 per 3.5  $\mu\text{m}$  stack). All images were from Layer 1. Example images show a single z plane from the  
1091 same location in the stack for both genotypes.

1092 In all cases, when comparing WT and KO per given experiment, slides were imaged on the same  
1093 day using set exposure.

#### 1094 **Image analysis**

1095 Image analysis was primarily done with ImageJ (NIH) or Imaris (Bitplane) software as described  
1096 below for each section:

1097 **Astrocyte number across development per layer** (Fig 1, S1) was done on sections of Aldh111-  
1098 GFP VC that were co-immunostained for VGlut2 using semi-automatic custom-made macro in  
1099 ImageJ. For each image, maximal intensity projections were created, then each cortical layer was  
1100 manually cropped based on DAPI and VGlut2 staining, and saved as a separate file. Then, a  
1101 colocalization file was created using the “colocalization threshold” function to merge the  
1102 colocalized cell marked by DAPI with the Aldh111-GFP signal to specifically select astrocytes.  
1103 Colocalized objects were counted using the “analyze particles” function. Number of astrocytes in  
1104 each layer was recorded for each developmental stage.

1105 The high cell density at early ages made it impossible to use a similar method to count the total  
1106 number of cells using the DAPI labels. Instead, 3 ROIs were created for each layer, and cells  
1107 were counted manually within each ROI, using the “multi-point” tool in ImageJ. The total cell  
1108 number in each layer was then extrapolated based on the total area measurement in each file.

1109 **Cell marker colocalization ribotag validation** (Fig 2, S2) was performed using FIJI (ImageJ).  
1110 Thresholding was performed on the ribotag labeled image (stained with an anti-HA tag antibody)  
1111 and the ‘Analyze Particles’ function was used with a minimum area of 20-40 $\mu\text{m}^2$  to automatically  
1112 separate and quantify the total number of ribotag positive cells. The number of double-labeled  
1113 ribotag and cell type antibody-positive cells were manually counted. This generated the proportion  
1114 of ribotag positive cells that also label for the cell-specific marker.

1115 **Astrocyte marker colocalization with Aldh111-Gfp** (Fig S1) an ROI containing the entire depth  
1116 of the cortex of a maximal intensity projection image, was cropped equally for each image.  
1117 Labeled cells were counted manually using the “cell counter” plugin in ImageJ. Positively labeled  
1118 cells were identified based on signal strength. For each file, 3 types of counts were made: the  
1119 appropriate astrocyte marker positive cell number, Aldh111-GFP positive cell number and  
1120 colocalized cell number.

1121 **Pre-synaptic development per layer** (Fig 1, S1) slides were immunostained for the presynaptic  
1122 markers VGlut1 and VGlut2 as described above and the signal was analyzed with ImageJ. As  
1123 above, for each file, maximal intensity projections were created, then layers were cropped out  
1124 manually and saved as separate files. VGlut signal was thresholded in the same way for all  
1125 images to contain all visible signal. The threshold area measurement was recorded for each file.

1126 **Post-synaptic development per layer** (Fig 1) slides were immunostained for the postsynaptic  
1127 markers GluA1 and GluA2 as described above. Confocal z-stack images were analyzed using  
1128 the Imaris software (Bitplane). GluA puncta number was calculated using the “spots” function,  
1129 and mean intensity filter to select the positive puncta. All images were thresholded in the same  
1130 way. To analyze specifically the GluA signal in the cell processes and not the soma, cell bodies

1131 labeled by DAPI were selected manually using the “create object” function. Then GluA puncta  
1132 number that colocalized with cell bodies was found. Finally, cell body-related GluA1 puncta were  
1133 subtracted from the total puncta number to obtain process-expressed GluAs.

1134 **Assessing the presence of thalamic projections to the VC in VGlut2 cKO mice** (Fig S4)  
1135 confocal z-stack images were analyzed using Imaris (Bitplane). tdTomato positive processes  
1136 were rendered using the “create object” function. All images were thresholded in the same way  
1137 to select labeled processes. Total volume was calculated and compared between the  
1138 experimental groups.

1139 VGlut2 puncta were rendered using the “create spots” function, and mean intensity filter to  
1140 threshold positive spots.

1141 **Analysis of VGlut1 and VGlut2 signal in VGlut2 cKO mice** (Fig 4, S4) images were analyzed  
1142 using ImageJ as described for developmental presynaptic experiments.

1143 **Counting astrocytes in VGlut2 cKO and IP3R2 KO mice** (Figs S4, S5) smFISH in situ images  
1144 (see below) were used to count astrocyte numbers within each layer. Counting was performed  
1145 manually using the “cell counter” plugin in ImageJ. Astrocytes were identified by positive Glast  
1146 probe signal.

1147 **Quantification of smFISH signal** (Figs 3, S3, 4, S4, 5, S5) was performed using a custom-made  
1148 macro in ImageJ. Maximal intensity projection images of the visual cortex were manually cropped  
1149 per layer and saved as individual files. Astrocytes were identified using the GFP signal in  
1150 experiments with Aldh1l1-GFP mice (Fig3, S3); and Glast probe signal in all other experiments  
1151 (Figs 4, S4, 5, S5). An ROI outline was then created around the cell body of the astrocyte, the  
1152 probe of interest was then thresholded in the same way for all images, and the threshold area  
1153 was recorded for each cell. We found that threshold area of the signal gave a more reliable and  
1154 stable result than intensity measurements, which are not recommended by smFISH protocol  
1155 (RNAscope by ACDbio). Due to the density of the signal in some cases, counting individual puncta  
1156 was impossible.

1157 **Quantification of pre and postsynaptic puncta, and synapses** (Figs 4, S4, 5, S5) 3D z stack  
1158 images were analyzed using Imaris software (Bitplane). Positive puncta of GluA1, GluA2, VGlut1,  
1159 VGlut2, Bassoon, and tdTomato processed (FigS4) were selected by size and intensity by  
1160 thresholding the images in the same way for each section. Then colocalization between each 2  
1161 pre-postsynaptic pairs was calculated. Puncta were considered colocalized if the distance  
1162 between them was  $\leq 0.5 \mu\text{m}$  (Blanco-Suarez et al., 2018; Farhy-Tselnicker et al., 2017). For  
1163 experiments described in FigS4L-S, first colocalization between tdTomato and Bassoon was  
1164 established, and cropped. The colocalized Bassoon-tdTomato puncta were then used to calculate  
1165 colocalization with GluA1, or GluA2. Number of colocalized puncta was obtained and compared  
1166 between the experimental groups. A minimum of 3 sections per mouse were imaged for each  
1167 brain region, and the experiment was repeated in at least 5 WT and KO pairs. Example images  
1168 show a single z plane from the same location in the stack for both genotypes.

1169

## 1170 **DATA PRESENTATION AND STATISTICAL ANALYSIS**

1171 All data is presented as either mean  $\pm$  s.e.m, scatter with mean  $\pm$  s.e.m, or scatter with range, as  
1172 indicated in each figure legend. Statistical analysis was performed using Prism software  
1173 (Graphpad). Multiple group comparisons were done using one-way Analysis of Variance  
1174 (ANOVA) with post hoc Tukey’s or Dunn’s tests. Pairwise comparisons were done by T-test. When  
1175 data did not pass the normal distribution test, multiple comparisons were done by Kruskal-Wallis  
1176 ANOVA on ranks and pairwise comparisons were done with the Mann-Whitney Rank Sum test.  
1177 P-value  $\leq 0.05$  was considered statistically significant. The sample sizes, statistical tests used  
1178 and significance are presented in each figure and figure legend.

1179

## 1180 **DATA AVAILABILITY**

1181 The Ribotag data is available at GEO GSE161398 and glial snRNAseq at GSE163775.

1182 **REFERENCES**

- 1183
- 1184 Albanese, A., Albanese, E.B., A., and Saavedra, J.P. (1983). A quantitative study of visual cortex  
1185 synapses during the postnatal development of dark-reared rats.
- 1186 Allen, N.J. (2013). Role of glia in developmental synapse formation. *Curr Opin Neurobiol* 23,  
1187 1027-1033.
- 1188 Allen, N.J., Bennett, M.L., Foo, L.C., Wang, G.X., Chakraborty, C., Smith, S.J., and Barres, B.A.  
1189 (2012). Astrocyte glypicans 4 and 6 promote formation of excitatory synapses via GluA1 AMPA  
1190 receptors. *Nature* 486, 410-414.
- 1191 Baldwin, K.T., and Eroglu, C. (2017). Molecular mechanisms of astrocyte-induced  
1192 synaptogenesis. *Curr Opin Neurobiol* 45, 113-120.
- 1193 Bannister, A.P. (2005). Inter- and intra-laminar connections of pyramidal cells in the neocortex.  
1194 *Neuroscience Research* 53, 95-103.
- 1195 Batiuk, M.Y., Martirosyan, A., Wahis, J., de Vin, F., Marneffe, C., Kusserow, C., Koeppen, J.,  
1196 Viana, J.F., Oliveira, J.F., Voet, T., *et al.* (2020). Identification of region-specific astrocyte  
1197 subtypes at single cell resolution. *Nature Communications* 11, 1220.
- 1198 Batool, S., Raza, H., Zaidi, J., Riaz, S., Hasan, S., and Syed, N.I. (2019). Synapse formation:  
1199 from cellular and molecular mechanisms to neurodevelopmental and neurodegenerative  
1200 disorders. *Journal of Neurophysiology* 121, 1381-1397.
- 1201 Bayraktar, O.A., Bartels, T., Holmqvist, S., Kleshchevnikov, V., Martirosyan, A., Polioudakis, D.,  
1202 Ben Haim, L., Young, A.M.H., Batiuk, M.Y., Prakash, K., *et al.* (2020). Astrocyte layers in the  
1203 mammalian cerebral cortex revealed by a single-cell in situ transcriptomic map. *Nature*  
1204 *Neuroscience*.
- 1205 Benediktsson, A.M., Marrs, G.S., Tu, J.C., Worley, P.F., Rothstein, J.D., Bergles, D.E., and  
1206 Dailey, M.E. (2012). Neuronal activity regulates glutamate transporter dynamics in developing  
1207 astrocytes. *Glia* 60, 175-188.
- 1208 Benner, E.J., Luciano, D., Jo, R., Abdi, K., Paez-Gonzalez, P., Sheng, H., Warner, D.S., Liu, C.,  
1209 Eroglu, C., and Kuo, C.T. (2013). Protective astrogenesis from the SVZ niche after injury is  
1210 controlled by Notch modulator Thbs4. *Nature* 497, 369-373.
- 1211 Bernardinelli, Y., Muller, D., and Nikonenko, I. (2014a). Astrocyte-Synapse Structural Plasticity.  
1212 *Neural Plasticity* 2014, 13.
- 1213 Bernardinelli, Y., Randall, J., Janett, E., Nikonenko, I., König, S., Jones, E.V., Flores, C.E., Murai,  
1214 K.K., Bochet, C.G., Holtmaat, A., *et al.* (2014b). Activity-dependent structural plasticity of  
1215 perisynaptic astrocytic domains promotes excitatory synapse stability. *Curr Biol* 24, 1679-1688.
- 1216 Blanco-Suarez, E., Liu, T.-F., Kopelevich, A., and Allen, N.J. (2018). Astrocyte-Secreted Chordin-  
1217 like 1 Drives Synapse Maturation and Limits Plasticity by Increasing Synaptic GluA2 AMPA  
1218 Receptors. *Neuron* 100, 1116-1132.e11113.

- 1219 Blue, M.E., and Parnavelas, J.G. (1983a). The formation and maturation of synapses in the visual  
1220 cortex of the rat. I. Qualitative analysis. *Journal of Neurocytology* 12, 599-616.
- 1221 Blue, M.E., and Parnavelas, J.G. (1983b). The formation and maturation of synapses in the visual  
1222 cortex of the rat. II. Quantitative analysis. *Journal of Neurocytology* 12, 697-712.
- 1223 Boisvert, M.M., Erikson, G.A., Shokhirev, M.N., and Allen, N.J. (2018). The Aging Astrocyte  
1224 Transcriptome from Multiple Regions of the Mouse Brain. *Cell Reports* 22, 269-285.
- 1225 Bosworth, A.P., and Allen, N.J. (2017). The diverse actions of astrocytes during synaptic  
1226 development. *Curr Opin Neurobiol* 47, 38-43.
- 1227 Brill, J., and Huguenard, J.R. (2008). Sequential Changes in AMPA Receptor Targeting in the  
1228 Developing Neocortical Excitatory Circuit. *J Neurosci* 28, 13918-13928.
- 1229 Bushong, E.A., Martone, M.E., and Ellisman, M.H. (2004). Maturation of astrocyte morphology  
1230 and the establishment of astrocyte domains during postnatal hippocampal development. *Int J Dev*  
1231 *Neurosci* 22, 73-86.
- 1232 Cahoy, J.D., Emery, B., Kaushal, A., Foo, L.C., Zamanian, J.L., Christopherson, K.S., Xing, Y.,  
1233 Lubischer, J.L., Krieg, P.A., Krupenko, S.A., *et al.* (2008). A transcriptome database for  
1234 astrocytes, neurons, and oligodendrocytes: a new resource for understanding brain development  
1235 and function. *J Neurosci* 28, 264-278.
- 1236 Cang, J., Rentería, R.C., Kaneko, M., Liu, X., Copenhagen, D.R., and Stryker, M.P. (2005).  
1237 Development of Precise Maps in Visual Cortex Requires Patterned Spontaneous Activity in the  
1238 Retina. *Neuron* 48, 797-809.
- 1239 Chaboub, L.S., and Deneen, B. (2012). Developmental Origins of Astrocyte Heterogeneity: The  
1240 final frontier of CNS development. *Developmental neuroscience* 34, 379-388.
- 1241 Chai, H., Diaz-Castro, B., Shigetomi, E., Monte, E., Oceau, J.C., Yu, X., Cohn, W., Rajendran,  
1242 P.S., Vondriska, T.M., Whitelegge, J.P., *et al.* (2017). Neural Circuit-Specialized Astrocytes:  
1243 Transcriptomic, Proteomic, Morphological, and Functional Evidence. *Neuron* 95, 531-549.e539.
- 1244 Chou, S.-J., Babot, Z., Leingärtner, A., Studer, M., Nakagawa, Y., and O'Leary, D.D.M. (2013).  
1245 Geniculocortical Input Drives Genetic Distinctions Between Primary and Higher-Order Visual  
1246 Areas. *Science (New York, NY)* 340, 10.1126/science.1232806.
- 1247 Christopherson, K.S., Ullian, E.M., Stokes, C.C.A., Mallowney, C.E., Hell, J.W., Agah, A., Lawler,  
1248 J., Mosher, D.F., Bornstein, P., and Barres, B.A. (2005). Thrombospondins Are Astrocyte-  
1249 Secreted Proteins that Promote CNS Synaptogenesis. *Cell* 120, 421-433.
- 1250 Chung, W.-S., Clarke, L.E., Wang, G.X., Stafford, B.K., Sher, A., Chakraborty, C., Joung, J., Foo,  
1251 L.C., Thompson, A., Chen, C., *et al.* (2013). Astrocytes mediate synapse elimination through  
1252 MEGF10 and MERTK pathways. *Nature* 504, 394-400.
- 1253 Desai, N.S., Cudmore Rh Fau - Nelson, S.B., Nelson Sb Fau - Turrigiano, G.G., and Turrigiano,  
1254 G.G. (2002). Critical periods for experience-dependent synaptic scaling in visual cortex.

- 1255 Dobin, A., Davis, C.A., Schlesinger, F., Drenkow, J., Zaleski, C., Jha, S., Batut, P., Chaisson, M.,  
1256 and Gingeras, T.R. (2013). STAR: ultrafast universal RNA-seq aligner. *Bioinformatics* 29, 15-21.
- 1257 Dougherty, J.D., Schmidt, E.F., Nakajima, M., and Heintz, N. (2010). Analytical approaches to  
1258 RNA profiling data for the identification of genes enriched in specific cells. *Nucleic Acids Research*  
1259 38, 4218-4230.
- 1260 Douglas, R.J., and Martin, K.A.C. (2004). NEURONAL CIRCUITS OF THE NEOCORTEX. *Annual*  
1261 *Review of Neuroscience* 27, 419-451.
- 1262 Durkee, C.A., and Araque, A. (2019). Diversity and Specificity of Astrocyte-neuron  
1263 Communication. *Neuroscience* 396, 73-78.
- 1264 Eroglu, Ç., Allen, N.J., Susman, M.W., O'Rourke, N.A., Park, C.Y., Özkan, E., Chakraborty, C.,  
1265 Mulinyawe, S.B., Annis, D.S., and Huberman, A.D. (2009). Gabapentin Receptor  $\alpha 2\delta$ -1 Is a  
1266 Neuronal Thrombospondin Receptor Responsible for Excitatory CNS Synaptogenesis. *Cell* 139,  
1267 380-392.
- 1268 Espinosa, J.S., and Stryker, M.P. (2012). Development and plasticity of the primary visual cortex.  
1269 *Neuron* 75, 230-249.
- 1270 Farhy-Tselnicker, I., and Allen, N.J. (2018). Astrocytes, neurons, synapses: a tripartite view on  
1271 cortical circuit development. *Neural Dev* 13, 7.
- 1272 Farhy-Tselnicker, I., van Casteren, A.C.M., Lee, A., Chang, V.T., Aricescu, A.R., and Allen, N.J.  
1273 (2017). Astrocyte-Secreted Glypican 4 Regulates Release of Neuronal Pentraxin 1 from Axons to  
1274 Induce Functional Synapse Formation. *Neuron* 96, 428-445.e413.
- 1275 Freire, M. (1978). Effects of dark rearing on dendritic spines in layer IV of the mouse visual cortex.  
1276 A quantitative electron microscopical study. *Journal of anatomy* 126, 193-201.
- 1277 Fremeau, R.T., Jr., Troyer, M.D., Pahner, I., Nygaard, G.O., Tran, C.H., Reimer, R.J., Bellocchio,  
1278 E.E., Fortin, D., Storm-Mathisen, J., and Edwards, R.H. (2001). The Expression of Vesicular  
1279 Glutamate Transporters Defines Two Classes of Excitatory Synapse. *Neuron* 31, 247-260.
- 1280 Funahashi, R., Maruyama T Fau - Yoshimura, Y., Yoshimura Y Fau - Komatsu, Y., and Komatsu,  
1281 Y. (2013). Silent synapses persist into adulthood in layer 2/3 pyramidal neurons of visual cortex  
1282 in dark-reared mice.
- 1283 Ge, W.-P., Miyawaki, A., Gage, F.H., Jan, Y.N., and Jan, L.Y. (2012). Local generation of glia is  
1284 a major astrocyte source in postnatal cortex. *Nature* 484, 376-380.
- 1285 Genoud, C., Quairiaux, C., Steiner, P., Hirling, H., Welker, E., and Knott, G.W. (2006). Plasticity  
1286 of astrocytic coverage and glutamate transporter expression in adult mouse cortex. *PLoS Biol* 4,  
1287 e343.
- 1288 Gonzalez-Lozano, M.A., Klemmer, P., Gebuis, T., Hassan, C., van Nierop, P., van Kesteren, R.E.,  
1289 Smit, A.B., and Li, K.W. (2016). Dynamics of the mouse brain cortical synaptic proteome during  
1290 postnatal brain development. *Scientific Reports* 6, 35456.

- 1291 Gribizis, A., Ge, X., Daigle, T.L., Ackman, J.B., Zeng, H., Lee, D., and Crair, M.C. (2019). Visual  
1292 Cortex Gains Independence from Peripheral Drive before Eye Opening. *Neuron* *104*, 711-  
1293 723.e713.
- 1294 Hanganu, I.L., Ben-Ari, Y., and Khazipov, R. (2006). Retinal Waves Trigger Spindle Bursts in the  
1295 Neonatal Rat Visual Cortex. *The Journal of Neuroscience* *26*, 6728.
- 1296 Hasel, P., Dando, O., Jiwaji, Z., Baxter, P., Todd, A.C., Heron, S., Márkus, N.M., McQueen, J.,  
1297 Hampton, D.W., Torvell, M., *et al.* (2017). Neurons and neuronal activity control gene expression  
1298 in astrocytes to regulate their development and metabolism. *Nature Communications* *8*, 15132.
- 1299 Heberle, H., Meirelles, G.V., da Silva, F.R., Telles, G.P., and Minghim, R. (2015). InteractiVenn:  
1300 a web-based tool for the analysis of sets through Venn diagrams. *BMC Bioinformatics* *16*, 169.
- 1301 Heiman, M., Kulicke, R., Fenster, R.J., Greengard, P., and Heintz, N. (2014). Cell type-specific  
1302 mRNA purification by translating ribosome affinity purification (TRAP). *Nature protocols* *9*, 1282-  
1303 1291.
- 1304 Heinz, S., Benner, C., Spann, N., Bertolino, E., Lin, Y.C., Laslo, P., Cheng, J.X., Murre, C., Singh,  
1305 H., and Glass, C.K. (2010). Simple combinations of lineage-determining transcription factors  
1306 prime cis-regulatory elements required for macrophage and B cell identities. *Mol Cell* *38*, 576-  
1307 589.
- 1308 Hie, B., Bryson, B., and Berger, B. (2019). Efficient integration of heterogeneous single-cell  
1309 transcriptomes using Scanorama. *Nature Biotechnology* *37*, 685-691.
- 1310 Hooks, B.M., and Chen, C. (2006). Distinct Roles for Spontaneous and Visual Activity in  
1311 Remodeling of the Retinogeniculate Synapse. *Neuron* *52*, 281-291.
- 1312 Hooks, B.M., and Chen, C. (2020). Circuitry Underlying Experience-Dependent Plasticity in the  
1313 Mouse Visual System. *Neuron* *106*, 21-36.
- 1314 Hsu, C.-L., Chou, C.-H., Huang, S.-C., Lin, C.-Y., Lin, M.-Y., Tung, C.-C., Lin, C.-Y., Lai, I.P., Zou,  
1315 Y.-F., Youngson, N.A., *et al.* (2018). Analysis of experience-regulated transcriptome and  
1316 imprintome during critical periods of mouse visual system development reveals spatiotemporal  
1317 dynamics. *Human Molecular Genetics* *27*, 1039-1054.
- 1318 Ishikawa, A.W., Komatsu, Y., and Yoshimura, Y. (2014). Experience-Dependent Emergence of  
1319 Fine-Scale Networks in Visual Cortex. *The Journal of Neuroscience* *34*, 12576.
- 1320 John Lin, C.-C., Yu, K., Hatcher, A., Huang, T.-W., Lee, H.K., Carlson, J., Weston, M.C., Chen,  
1321 F., Zhang, Y., Zhu, W., *et al.* (2017). Identification of diverse astrocyte populations and their  
1322 malignant analogs. *Nature Neuroscience* *20*, 396.
- 1323 Kepecs, A., and Fishell, G. (2014). Interneuron cell types are fit to function. *Nature* *505*, 318-326.
- 1324 Khakh, B.S., and Deneen, B. (2019). The Emerging Nature of Astrocyte Diversity. *Annual Review*  
1325 *of Neuroscience* *42*, 187-207.
- 1326 Ko, H.A.-O., Mrcic-Flogel, T.D., and Hofer, S.B. (2014). Emergence of feature-specific  
1327 connectivity in cortical microcircuits in the absence of visual experience.



- 1328 Kofuji, P., and Araque, A. (2020). G-Protein-Coupled Receptors in Astrocyte–Neuron  
1329 Communication. *Neuroscience*.
- 1330 Kumar, S.S., Bacci, A., Kharazia, V., and Huguenard, J.R. (2002). A developmental switch of  
1331 AMPA receptor subunits in neocortical pyramidal neurons. *J Neurosci* 22, 3005-3015.
- 1332 Lanjakornsiripan, D., Pior, B.-J., Kawaguchi, D., Furutachi, S., Tahara, T., Katsuyama, Y., Suzuki,  
1333 Y., Fukazawa, Y., and Gotoh, Y. (2018). Layer-specific morphological and molecular differences  
1334 in neocortical astrocytes and their dependence on neuronal layers. *Nature Communications* 9,  
1335 1623.
- 1336 Lepeta, K., Lourenco, M.V., Schweitzer, B.C., Martino Adami, P.V., Banerjee, P., Catuara-Solarz,  
1337 S., de La Fuente Revenga, M., Guillem, A.M., Haidar, M., Ijomone, O.M., *et al.* (2016).  
1338 Synaptopathies: synaptic dysfunction in neurological disorders - A review from students to  
1339 students. *Journal of neurochemistry* 138, 785-805.
- 1340 Li, H., Fertuzinhos, S., Mohns, E., Hnasko, Thomas S., Verhage, M., Edwards, R., Sestan, N.,  
1341 and Crair, Michael C. (2013). Laminar and Columnar Development of Barrel Cortex Relies on  
1342 Thalamocortical Neurotransmission. *Neuron* 79, 970-986.
- 1343 Li, M., Cui, Z., Niu, Y., Liu, B., Fan, W., Yu, D., and Deng, J. (2010). Synaptogenesis in the  
1344 developing mouse visual cortex. *Brain Research Bulletin* 81, 107-113.
- 1345 Li, X., Zima Aleksey, V., Sheikh, F., Blatter Lothar, A., and Chen, J. (2005). Endothelin-1–Induced  
1346 Arrhythmogenic Ca<sup>2+</sup> Signaling Is Abolished in Atrial Myocytes of Inositol-1,4,5-  
1347 Trisphosphate(IP<sub>3</sub>)–Receptor Type 2–Deficient Mice. *Circulation Research* 96, 1274-1281.
- 1348 Lopez-Bendito, G., and Molnar, Z. (2003). Thalamocortical development: how are we going to get  
1349 there? *Nat Rev Neurosci* 4, 276-289.
- 1350 Love, M.I., Huber, W., and Anders, S. (2014). Moderated estimation of fold change and dispersion  
1351 for RNA-seq data with DESeq2. *Genome Biology* 15, 550.
- 1352 Luecken, M.D., and Theis, F.J. (2019). Current best practices in single-cell RNA-seq analysis: a  
1353 tutorial. *Molecular Systems Biology* 15, e8746.
- 1354 Majdan, M., and Shatz, C.J. (2006). Effects of visual experience on activity-dependent gene  
1355 regulation in cortex. *Nature Neuroscience* 9, 650-659.
- 1356 Markram, H., Toledo-Rodriguez, M., Wang, Y., Gupta, A., Silberberg, G., and Wu, C. (2004).  
1357 Interneurons of the neocortical inhibitory system. *Nat Rev Neurosci* 5, 793-807.
- 1358 Marques, S., Zeisel, A., Codeluppi, S., van Bruggen, D., Mendanha Falcão, A., Xiao, L., Li, H.,  
1359 Häring, M., Hochgerner, H., Romanov, R.A., *et al.* (2016). Oligodendrocyte heterogeneity in the  
1360 mouse juvenile and adult central nervous system. *Science* 352, 1326.
- 1361 McCarthy, K.D., and de Vellis, J. (1980). Preparation of separate astroglial and oligodendroglial  
1362 cell cultures from rat cerebral tissue. *The Journal of cell biology* 85, 890-902.
- 1363 McInnes, L., Healy, J., and Melville, J. (2018). UMAP: Uniform Manifold Approximation and  
1364 Projection for Dimension Reduction.

- 1365 Migliore, M., and Shepherd, G.M. (2005). An integrated approach to classifying neuronal  
1366 phenotypes. *Nature Reviews Neuroscience* 6, 810-818.
- 1367 Müller, C.M. (1990). Dark-rearing retards the maturation of astrocytes in restricted layers of cat  
1368 visual cortex.
- 1369 Nagai, J., Rajbhandari, A.K., Gangwani, M.R., Hachisuka, A., Coppola, G., Masmanidis, S.C.,  
1370 Fanselow, M.S., and Khakh, B.S. (2019). Hyperactivity with Disrupted Attention by Activation of  
1371 an Astrocyte Synaptogenic Cue. *Cell*.
- 1372 Oberheim, N.A., Goldman, S.A., and Nedergaard, M. (2012). Heterogeneity of Astrocytic Form  
1373 and Function. *Methods in molecular biology (Clifton, NJ)* 814, 23-45.
- 1374 Orth, M., and Bellosta, S. (2012). Cholesterol: Its Regulation and Role in Central Nervous System  
1375 Disorders. *Cholesterol* 2012, 292598.
- 1376 Petravicz, J., Boyt, K.M., and McCarthy, K.D. (2014). Astrocyte IP3R2-dependent Ca<sup>2+</sup> signaling  
1377 is not a major modulator of neuronal pathways governing behavior. *Frontiers in Behavioral*  
1378 *Neuroscience* 8, 384.
- 1379 Petzoldt, A.G., and Sigrist, S.J. (2014). Synaptogenesis. *Current Biology* 24, R1076-R1080.
- 1380 Porter, J.T., and McCarthy, K.D. (1997). ASTROCYTIC NEUROTRANSMITTER RECEPTORS  
1381 IN SITU AND IN VIVO. *Progress in Neurobiology* 51, 439-455.
- 1382 Rusnakova, V., Honsa, P., Dzamba, D., Ståhlberg, A., Kubista, M., and Anderova, M. (2013).  
1383 Heterogeneity of Astrocytes: From Development to Injury – Single Cell Gene Expression. *PLoS*  
1384 *ONE* 8, e69734.
- 1385 Schitine, C., Nogaroli, L., Costa, M.R., and Hedin-Pereira, C. (2015). Astrocyte heterogeneity in  
1386 the brain: from development to disease. *Frontiers in Cellular Neuroscience* 9, 76.
- 1387 Srinivasan, R., Huang, B.S., Venugopal, S., Johnston, A.D., Chai, H., Zeng, H., Golshani, P., and  
1388 Khakh, B.S. (2015). Ca<sup>2+</sup> signaling in astrocytes from *Ip3r2*<sup>-/-</sup> mice in brain slices and during  
1389 startle responses in vivo. *Nature Neuroscience* 18, 708.
- 1390 Stogsdill, J.A., Ramirez, J., Liu, D., Kim, Y.H., Baldwin, K.T., Enustun, E., Ejikeme, T., Ji, R.-R.,  
1391 and Eroglu, C. (2017). Astrocytic neuroligins control astrocyte morphogenesis and  
1392 synaptogenesis. *Nature* 551, 192.
- 1393 Südhof, T.C. (2018). Towards an Understanding of Synapse Formation.
- 1394 Szklarczyk, D., Gable, A.L., Lyon, D., Junge, A., Wyder, S., Huerta-Cepas, J., Simonovic, M.,  
1395 Doncheva, N.T., Morris, J.H., Bork, P., *et al.* (2019). STRING v11: protein-protein association  
1396 networks with increased coverage, supporting functional discovery in genome-wide experimental  
1397 datasets. *Nucleic acids research* 47, D607-D613.
- 1398 Tasic, B., Yao, Z., Graybuck, L.T., Smith, K.A., Nguyen, T.N., Bertagnolli, D., Goldy, J., Garren,  
1399 E., Economo, M.N., Viswanathan, S., *et al.* (2018). Shared and distinct transcriptomic cell types  
1400 across neocortical areas. *Nature* 563, 72-78.

- 1401 Tien, A.-C., Tsai, H.-H., Molofsky, A.V., McMahon, M., Foo, L.C., Kaul, A., Dougherty, J.D.,  
1402 Heintz, N., Gutmann, D.H., Barres, B.A., *et al.* (2012). Regulated temporal-spatial astrocyte  
1403 precursor cell proliferation involves BRAF signalling in mammalian spinal cord. *Development*  
1404 (Cambridge, England) *139*, 2477-2487.
- 1405 Traag, V.A., Waltman, L., and van Eck, N.J. (2019). From Louvain to Leiden: guaranteeing well-  
1406 connected communities. *Scientific Reports* *9*, 5233.
- 1407 Tropea, D., Kreiman, G., Lyckman, A., Mukherjee, S., Yu, H., Horng, S., and Sur, M. (2006). Gene  
1408 expression changes and molecular pathways mediating activity-dependent plasticity in visual  
1409 cortex. *Nature Neuroscience* *9*, 660-668.
- 1410 Tyzack, G.E., Sitnikov, S., Barson, D., Adams-Carr, K.L., Lau, N.K., Kwok, J.C., Zhao, C.,  
1411 Franklin, R.J.M., Karadottir, R.T., Fawcett, J.W., *et al.* (2014). Astrocyte response to motor neuron  
1412 injury promotes structural synaptic plasticity via STAT3-regulated TSP-1 expression. *Nature*  
1413 *Communications* *5*, 4294.
- 1414 Ullensvang, K., Lehre, K.P., Storm-Mathisen, J., and Danbolt, N.C. (1997). Differential  
1415 Developmental Expression of the Two Rat Brain Glutamate Transporter Proteins GLAST and  
1416 GLT. *European Journal of Neuroscience* *9*, 1646-1655.
- 1417 Ullian, E.M., Sapperstein, S.K., Christopherson, K.S., and Barres, B.A. (2001). Control of synapse  
1418 number by glia. *Science* *291*, 657-661.
- 1419 Van Hove, H., Martens, L., Scheyltjens, I., De Vlaminck, K., Pombo Antunes, A.R., De Prijck, S.,  
1420 Vandamme, N., De Schepper, S., Van Isterdael, G., Scott, C.L., *et al.* A single-cell atlas of mouse  
1421 brain macrophages reveals unique transcriptional identities shaped by ontogeny and tissue  
1422 environment.
- 1423 Ventura, R., and Harris, K.M. (1999). Three-Dimensional Relationships between Hippocampal  
1424 Synapses and Astrocytes. *J Neurosci* *19*, 6897-6906.
- 1425 Verhage, M., Maia, A.S., Plomp, J.J., Brussaard, A.B., Heeroma, J.H., Vermeer, H., Toonen, R.F.,  
1426 Hammer, R.E., van den, T.K., Berg, *et al.* (2000). Synaptic Assembly of the Brain in the Absence  
1427 of Neurotransmitter Secretion. *Science* *287*, 864-869.
- 1428 Wallén-Mackenzie, A., Wootz, H., and Englund, H. (2010). Genetic inactivation of the vesicular  
1429 glutamate transporter 2 (VGLUT2) in the mouse: what have we learnt about functional  
1430 glutamatergic neurotransmission? *Ups J Med Sci* *115*, 11-20.
- 1431 Winzeler, A., and Wang, J.T. (2013). Purification and culture of retinal ganglion cells from rodents.  
1432 *Cold Spring Harb Protoc* *2013*, 643-652.
- 1433 Wolock, S.L., Lopez, R., and Klein, A.M. (2019). Scrublet: Computational Identification of Cell  
1434 Doublets in Single-Cell Transcriptomic Data. *Cell Systems* *8*, 281-291.e289.
- 1435 Zechel, S., Nakagawa, Y., and Ibáñez, C.F. (2016). Thalamo-cortical axons regulate the radial  
1436 dispersion of neocortical GABAergic interneurons. *eLife* *5*, e20770.

- 1437 Zeisel, A., Hochgerner, H., Lönnerberg, P., Johnsson, A., Memic, F., van der Zwan, J., Häring,  
1438 M., Braun, E., Borm, L.E., La Manno, G., *et al.* (2018). Molecular Architecture of the Mouse  
1439 Nervous System. *Cell* 174, 999-1014.e1022.
- 1440 Zeisel, A., Muñoz-Manchado, A.B., Codeluppi, S., Lönnerberg, P., La Manno, G., Juréus, A.,  
1441 Marques, S., Munguba, H., He, L., Betsholtz, C., *et al.* (2015). Brain structure. Cell types in the  
1442 mouse cortex and hippocampus revealed by single-cell RNA-seq. *Science*.
- 1443

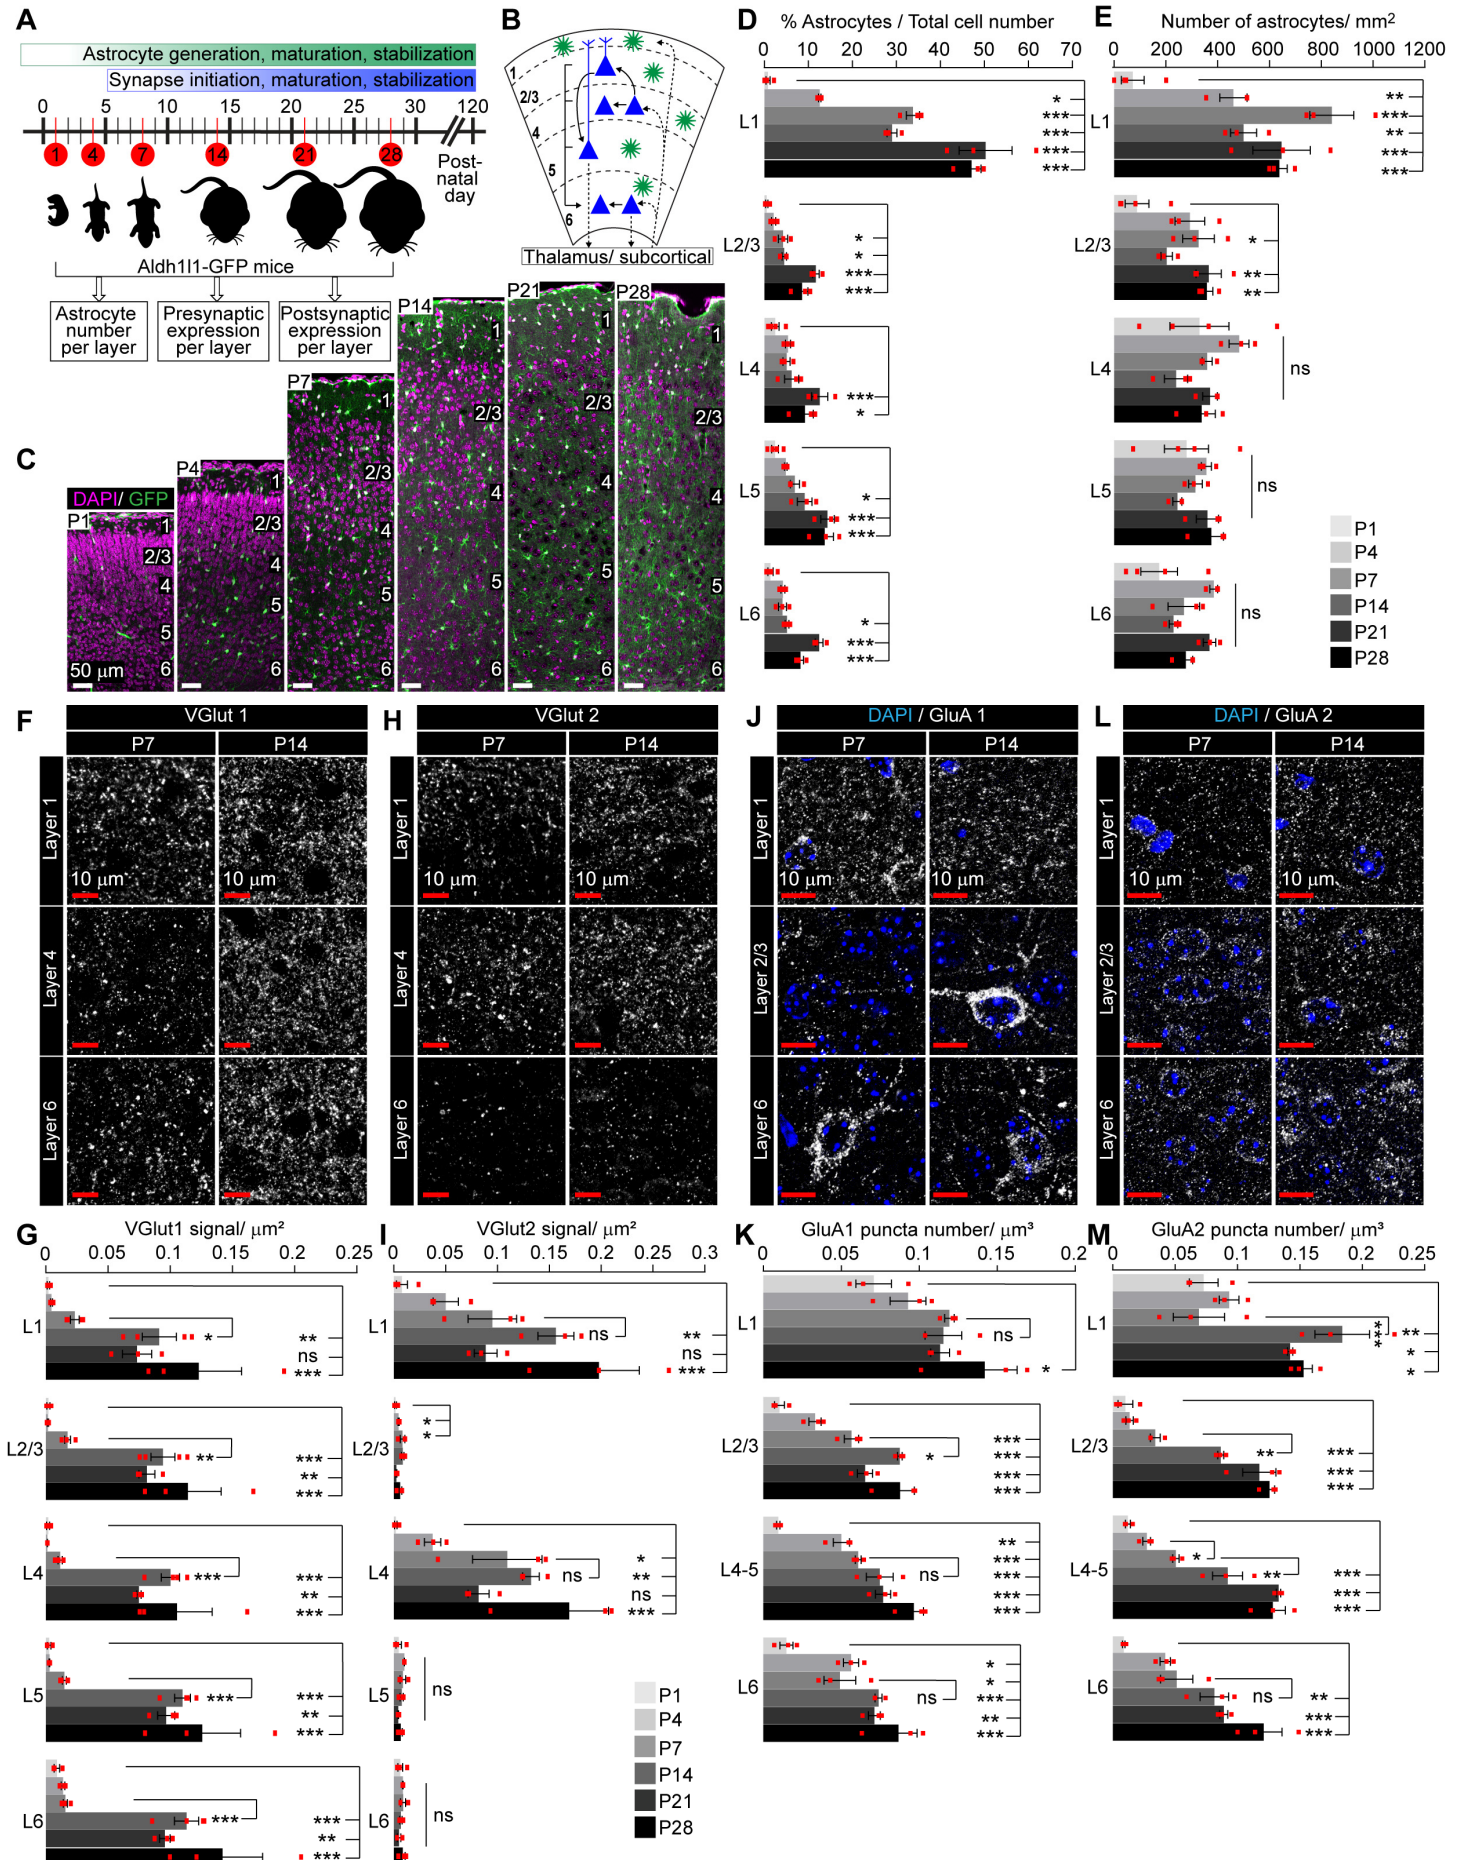

**Figure 1. Development of astrocytes and synapses in the mouse visual cortex.** See also Fig S1, Table S1. **A.** Schematic of time points of VC development analyzed, corresponding to synapse development. **B.** Diagram of VC depicting neuronal (blue) laminar arrangement and connectivity (arrows). Astrocytes (green) are present in all layers. **C-E.** Astrocyte number increases in the VC across development. **C.** Example images of the VC from *Aldh111-GFP* mice at time points analyzed. GFP marks astrocytes (green), DAPI (magenta) labels nuclei. Layers labeled by numbers on the right in each panel. **D.** Quantification of C, astrocytes as a percentage of total cells within each cortical layer. **E.** Quantification of C, number of astrocytes per mm<sup>2</sup> of VC within each layer. **F-I.** Developmental expression pattern of the presynaptic proteins VGlut1 and VGlut2 in each cortical layer. **F, H.** Example images of VGlut1 or VGlut2 protein levels (white puncta). **G, I.** Quantification of F, H, density of VGlut1 or VGlut2 signal as threshold area per  $\mu\text{m}^2$ . **J-M.** Developmental expression pattern of the postsynaptic AMPAR subunits GluA1 and GluA2 within each cortical layer. **J, L.** Example images of GluA1 or GluA2 protein levels (white puncta), DAPI (blue) labels nuclei. **K, M.** Quantification of J, L number of GluA1 or GluA2 positive puncta per cortical volume ( $\mu\text{m}^3$ ). Scale bars in C: 50 $\mu\text{m}$ ; In F, H, J, L: 10 $\mu\text{m}$ . In C-E: N=4 mice for P1; N=3 mice for P4-P28. In F-M: N= 3 mice/ age. Graphs show mean  $\pm$ s.e.m., red squares average of individual mouse. \*P  $\leq$  0.05 \*\*P<0.01, \*\*\*P<0.001, ns (not significant) by one-way ANOVA comparing expression between time points within each layer.

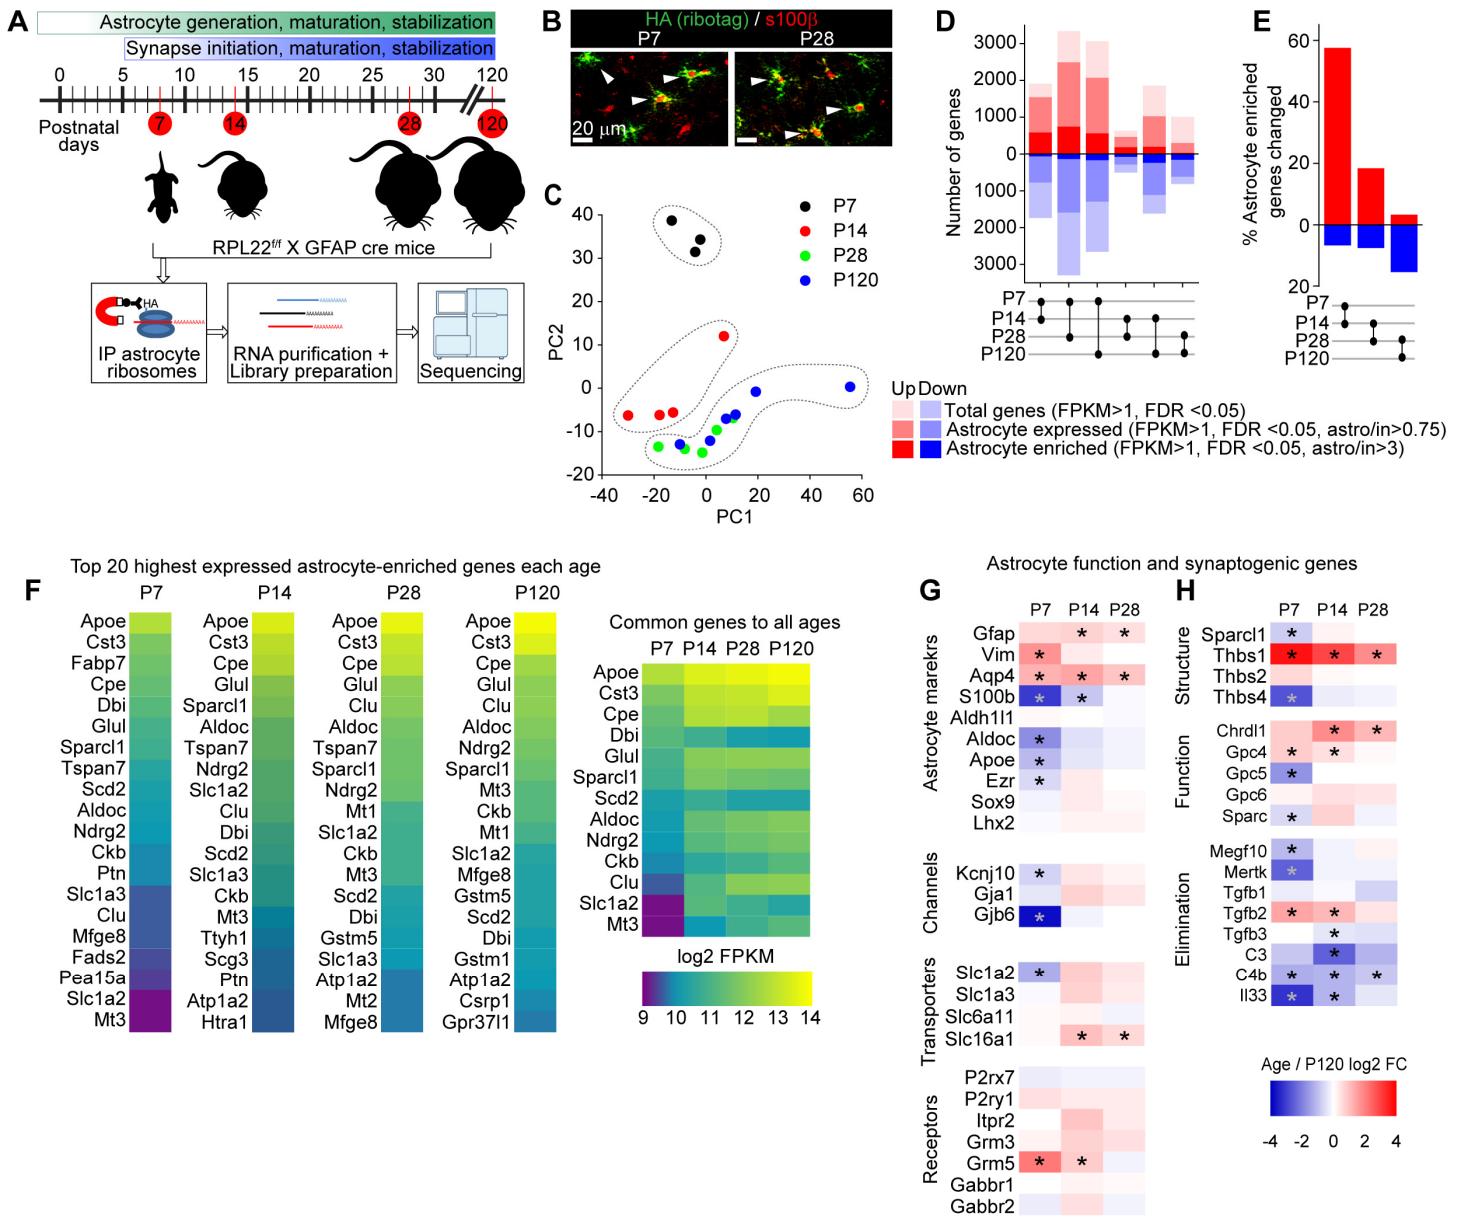

**Figure 2. Determination of the astrocyte transcriptome across visual cortex development.** See also Fig S2, Table S2. **A.** VCs from Rpl22-HA<sup>f/+</sup>; Gfap-cre 73.12 mice were collected at different time points corresponding to synapse development and maturation and subjected to Ribo-tag pulldown protocol, followed by RNA purification, library preparation and sequencing. **B.** Example images of VC at P7 and P28, showing colocalization between Ribo-tag (green, HA) and astrocyte marker s100 $\beta$  (red). **C.** PC analysis of RNAseq data shows P7 and P14 samples clustering separately from other ages, while P28 and P120 samples cluster together, suggesting similar gene expression profiles (N=3 at P7, 4 at P14, 5 at P28, 3 at P120. For statistical comparisons 3xP120 samples published in (Boisvert et al., 2018) were added to increase the power of the analysis, giving an N=6 P120). Scale bars = 20  $\mu$ m. **D.** Pairwise comparison of differentially expressed genes (DEGs; red – upregulated, blue - downregulated) between each time point showing total genes (all DEGs identified with FPKM>1), astrocyte expressed genes (expression level in pulldown sample/input >0.75), and astrocyte enriched genes (expression level in pulldown sample/input >3). **E.** Percent of all astrocyte enriched genes that are differentially expressed between each age. **F.** Heatmaps of top 20 astrocyte enriched genes at each age, sorted by expression level, along with 13 genes common to all time points. Colors represent log<sub>2</sub> FPKM of expression level. **G, H.** Heatmaps of select genes related to astrocyte function (G) and synaptic regulation (H). Plotted as Log<sub>2</sub> FC at each age relative to P120. \* FDR < 0.05 by DESeq2 with Benjamini-Hochberg's correction when comparing P120 to each age.



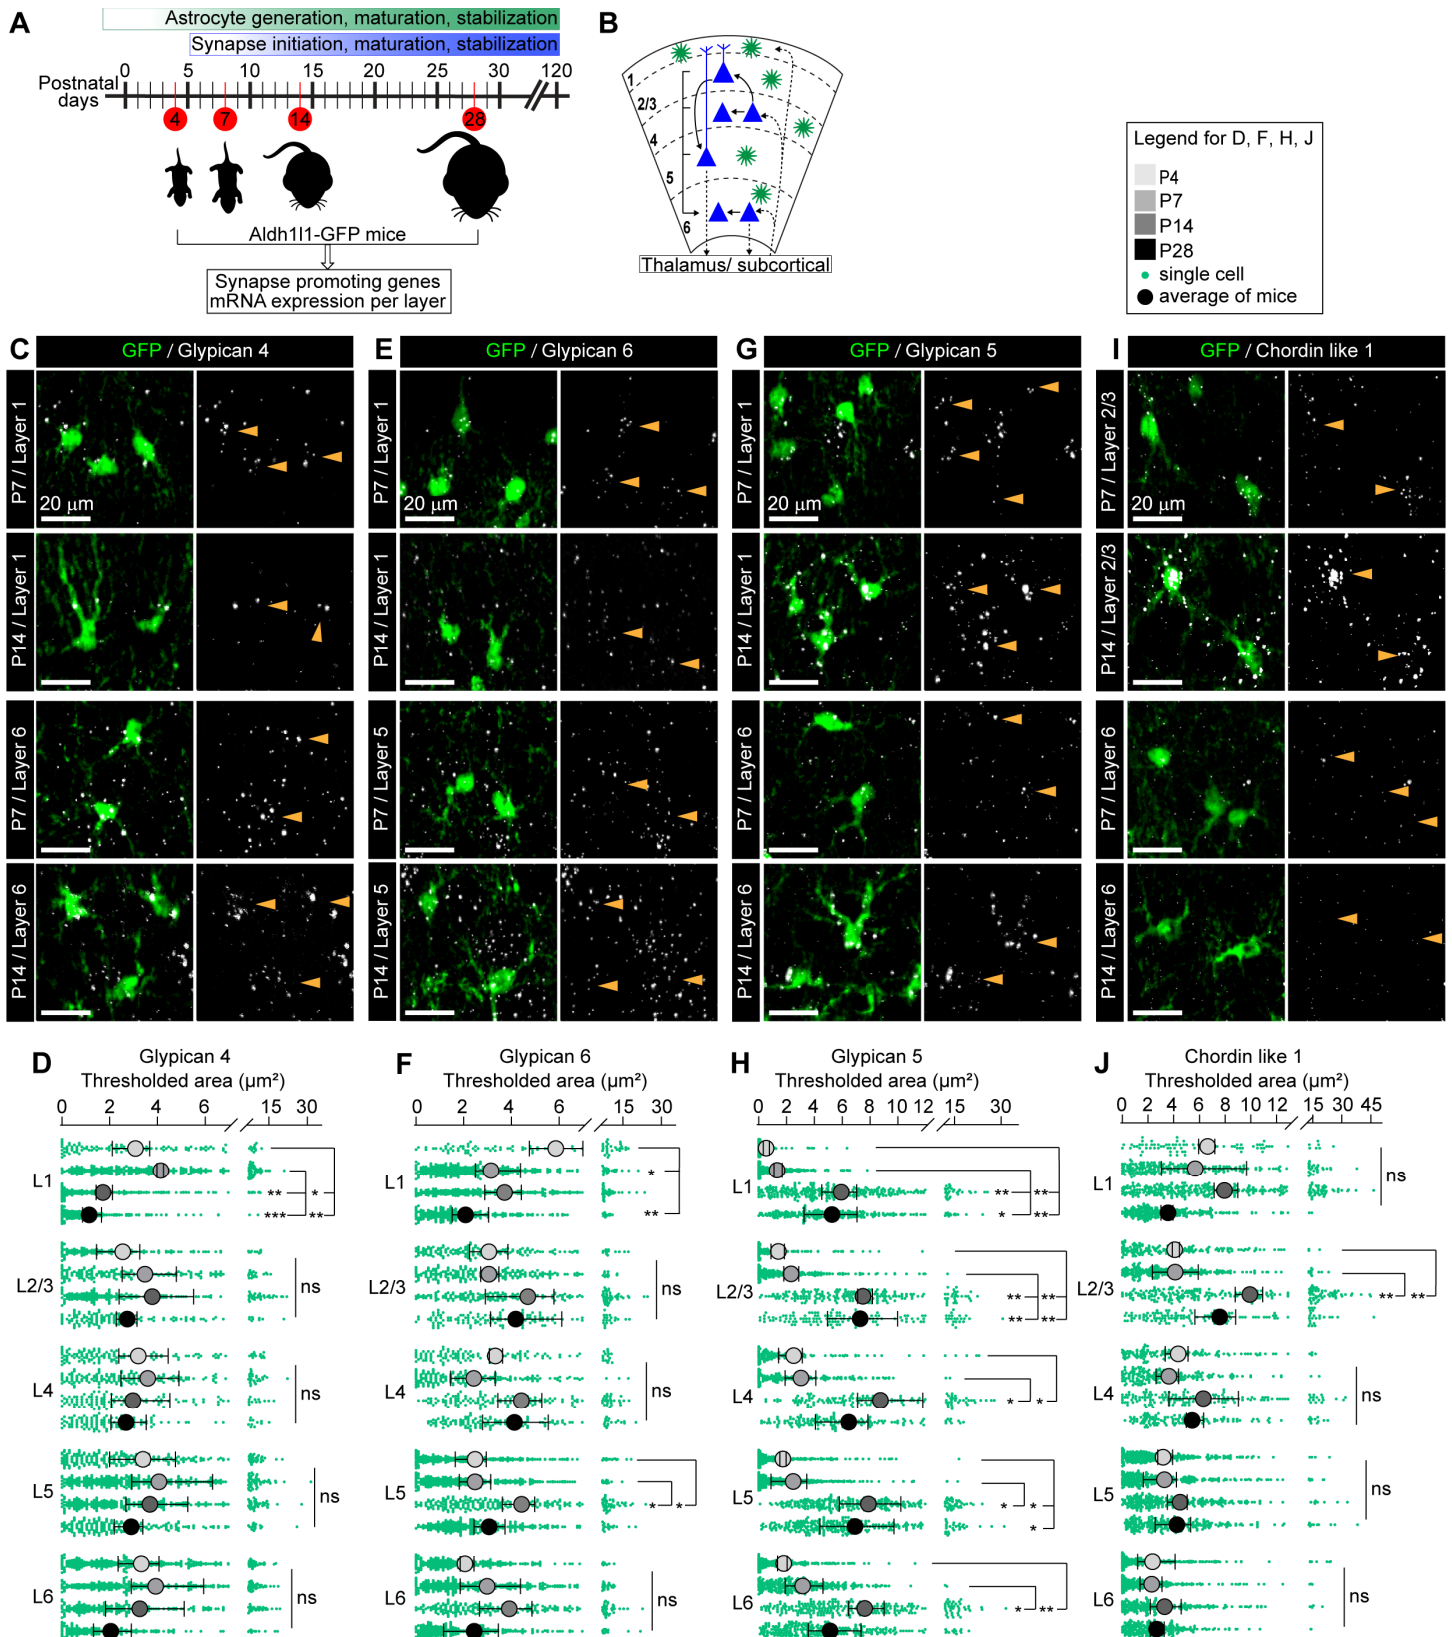

**Figure 3. Synapse-regulating genes in astrocytes show differential spatio-temporal expression.** See also Fig S3, Table S3. **A.** VCs were collected from *Aldh111-GFP* mice at different post-natal ages corresponding to synapse development. In situ hybridization (ISH) was performed to assess mRNA level for synapse-regulating genes in astrocytes in each layer. **B.** Diagram of visual cortex depicting neuronal (blue) laminar arrangement and connectivity (arrows). Astrocytes (green) present in all layers of the VC. **C, E, G, I.** Example images showing *Gpc4*, *Gpc6*, *Gpc5* or *Chrd11* mRNA (white) in astrocytes (green) at each age and layer as labeled. Merged panel on the left, single-channel probe panel on the right. Arrowheads in single-channel panel mark astrocyte cells on the left. Scale bars = 20  $\mu$ m. **D, F, H, J.** Quantification of C, E, G, I respectively. **D.** *Gpc4* expression is reduced at P14 specifically in L1. **F.** *Gpc6* expression is increased at P14 in L5. **H.** *Gpc5* expression is increased at P14 in all layers. **J.** *Chrd11* expression is increased at P14 in L2/3. Data presented as scatter with mean + range, large circles average calculated from data per mouse and colored according to time point, green dots signal per astrocyte. N=3 mice/age, n~50-350 astrocytes/per age; averages and statistical analysis are calculated based on N=3 i.e. data per mouse. \*P  $\leq$  0.05 \*\*P<0.01, \*\*\*P<0.001, ns (not significant) by one-way ANOVA comparing expression between time points within each layer.

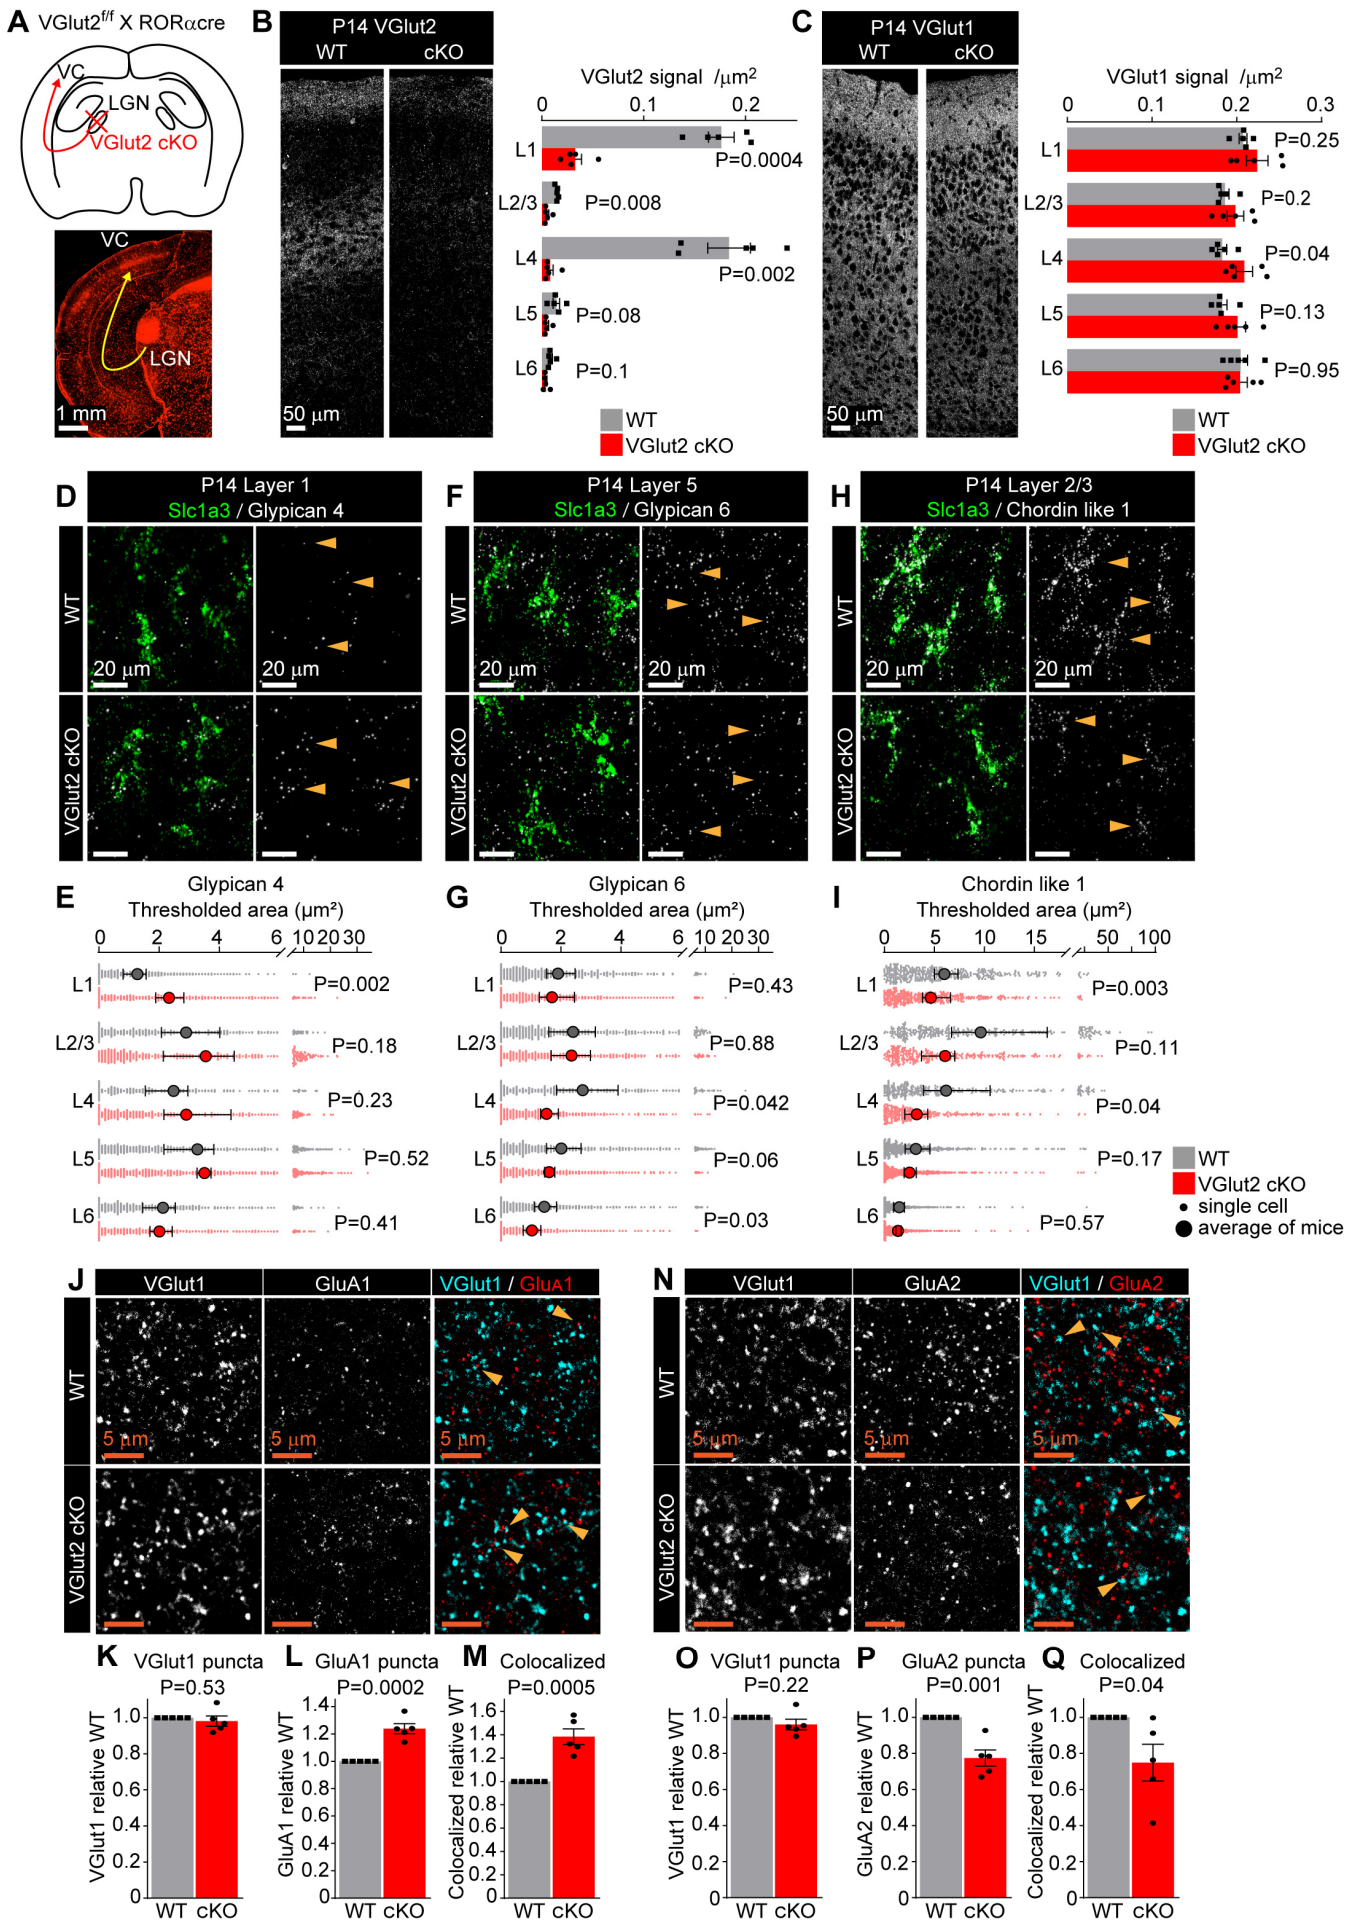

**Figure 4. Neuronal activity tunes astrocyte expression of synapse-regulating genes.** See also Fig S4, Table S4. **A.** Schematic of the experiment: VGlut2 is removed from presynaptic terminals of neurons in the lateral geniculate nucleus of the thalamus (LGN), that project to the visual cortex (VC), by crossing VGlut2 f/f mouse (WT) with RORacre mouse line (VGlut2 cKO). Bottom: image of tdTomato reporter expression in the LGN and the VC, when RORacre mouse is crossed with cre-dependent tdTomato reporter mouse. **B.** VGlut2 expression in the VC is significantly reduced in VGlut2 cKO mice. Example images of VGlut2 immunostaining in each genotype and quantification of the thresholded signal within each cortical layer. **C.** VGlut1 level is unaltered in VGlut2 cKO mice. Example images of VGlut1 immunostaining and quantification. In B, C. plots show mean signal  $\pm$  s.e.m. Squares and circles are the average of signal in each mouse. N=5 mice/genotype. Scale bar = 50  $\mu$ m. Statistical analysis by t-test within each layer. P-value on each plot. **D-I.** mRNA expression of astrocyte synapse-regulating genes is altered in VGlut2 cKO at P14. **D, F, H.** Example images of in situ hybridization of Gpc4, Gpc6 and Chrd1 mRNA (white) as labeled; astrocyte marker Slc1a3 (Glast, green). Merged panel on the left, single-channel probe panel on the right. Arrowheads in single-channel panel mark astrocytes. Scale bar = 20  $\mu$ m. **E, G, I.** Quantification of D, F, G respectively. **E.** Gpc4 mRNA expression is increased in L1; **G.** Gpc6 mRNA expression is decreased in L4-6; **I.** Chrd1 mRNA expression is decreased in L1-4 in VGlut2 cKO mice. Data presented as scatter with mean + range, large circles are the average signal calculated from data per mouse. Grey or red dots are signals in individual astrocytes in WT and VGlut2 cKO respectively. N=5 mice/genotype, n $\approx$ 200-450 astrocytes/ per age total (average and statistical analysis is calculated based on N=5 i.e. per mouse). Statistical analysis by paired t-test within each layer. P value on each plot. **J-M.** Increase in GluA1 protein levels and colocalization between GluA1 and VGlut1 in L1 of the VC in VGlut2 cKO mice at P14. **J.** Example images from WT (top) and cKO (bottom), VGlut1 in cyan and GluA1 in red. **K, L, M.** Quantification of VGlut1, GluA1 and colocalized puncta respectively, normalized to WT. **N-Q.** Decrease in GluA2 protein levels and colocalization between GluA2 and VGlut1 in L1 of the VC in VGlut2 cKO mice at P14. **N.** Example images from WT (top) and cKO (bottom), VGlut1 in cyan and GluA2 in red. **O, P, Q.** Quantification of VGlut1, GluA2 and colocalized puncta respectively, normalized to WT. In K-M and O-Q data presented as mean  $\pm$  s.e.m, squares and circles each mouse. N=5 mice/ genotype. Arrowheads mark representative colocalized puncta in J, N. Scale bar = 5  $\mu$ m. Statistical analysis by t-test, p-value on each plot.

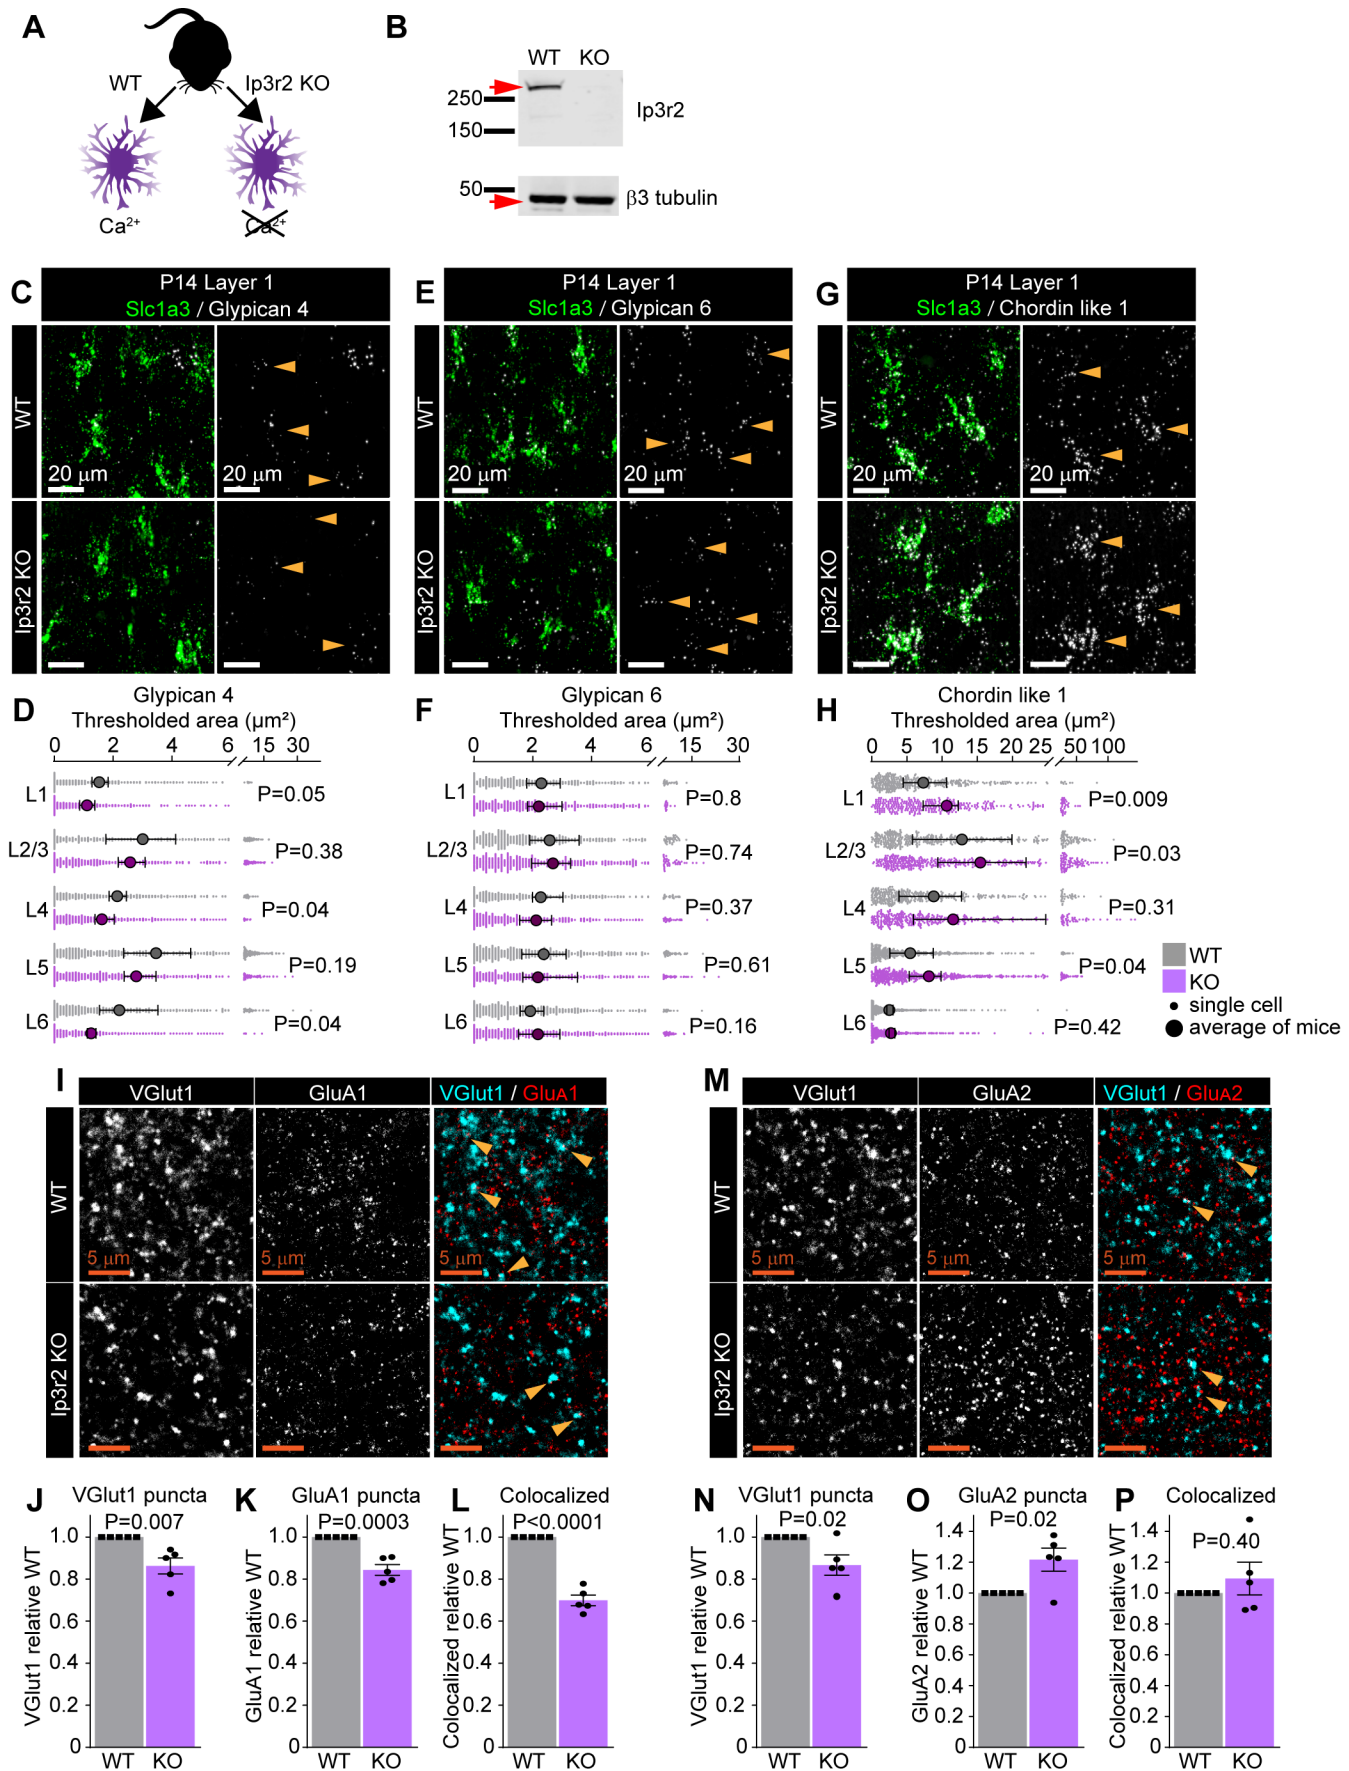

**Figure 5. Astrocyte calcium signaling regulates expression of synapse-regulating genes.** See also Fig S5, Table S4. **A.** Schematic of comparison. Lack of the Ip3r2 receptor results in diminished  $Ca^{2+}$  transients in astrocytes. **B.** Validation of Ip3r2 KO model. Western blot shows absence of Ip3r2 signal in VC of KO mice. **C-H.** mRNA expression of astrocyte synapse-regulating genes is altered in Ip3r2 KO mice at P14. **C, E, G.** Example images of in situ hybridization of Gpc4, Gpc6 and Chrdl1 mRNA (white); astrocyte marker Slc1a3 (Glast, green). Merged panel on the left, single-channel probe panel on the right. Arrowheads in single-channel panel mark astrocytes. Scale bar = 20  $\mu$ m. **D, F, H.** Quantification of C, E, G respectively. **D.** Gpc4 mRNA expression is decreased in several layers of the VC in Ip3r2 KO mice. **F.** Gpc6 mRNA expression is unaltered in the VC in Ip3r2 KO mice. **H.** Chrdl1 mRNA expression is increased in several layers of the VC in Ip3r2 KO mice. Data presented as scatter with mean + range, large circles are calculated from average signal per mouse. Grey or purple dots are signal per astrocyte in WT and Ip3r2 KO respectively. N=5 mice/genotype, n=~200-450 astrocytes/ per age total (average and statistical analysis is calculated based on N=5 i.e. per mouse). Statistical analysis by paired t-test within each layer. P value on each plot. **I-L.** Decrease in VGlut1, GluA1 protein levels, and colocalization between GluA1 and VGlut1 in L1 of the VC in Ip3r2 KO mice at P14. **I.** Example images from WT (top) and KO (bottom), VGlut1 in cyan and GluA1 in red. **J, K, L.** Quantification of VGlut1, GluA1 and colocalized puncta respectively, normalized to WT. **M-P.** Decrease in VGlut1, and increase GluA2 protein levels, with no change in colocalization between GluA2 and VGlut1 in L1 of the VC in Ip3r2 KO mice at P14. **M.** Example images from WT (top) and KO (bottom), VGlut1 in cyan and GluA2 in red. **N, O, P.** Quantification of VGlut1, GluA2 and colocalized puncta respectively, normalized to WT. In J-L and N-P data presented as mean  $\pm$  s.e.m, squares and circles represent mice. N=5 mice/genotype. Arrowheads mark representative colocalized puncta. Scale bar = 5  $\mu$ m. Statistical analysis by t-test, p-value on each plot.

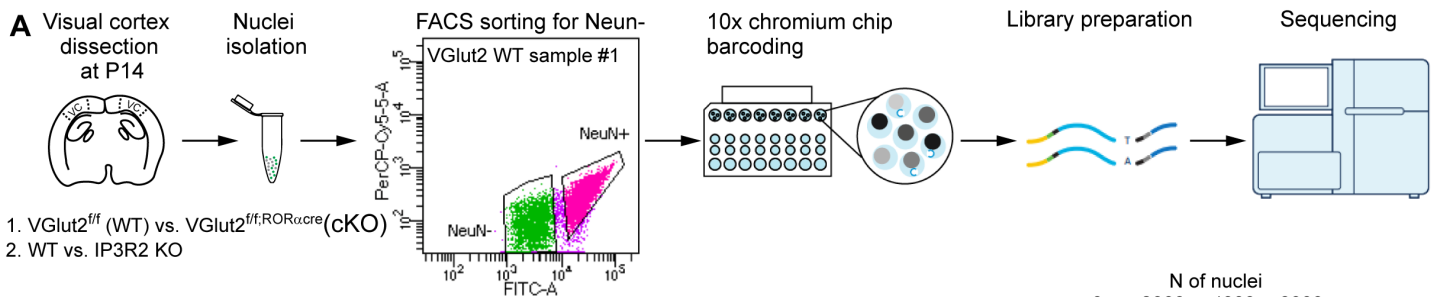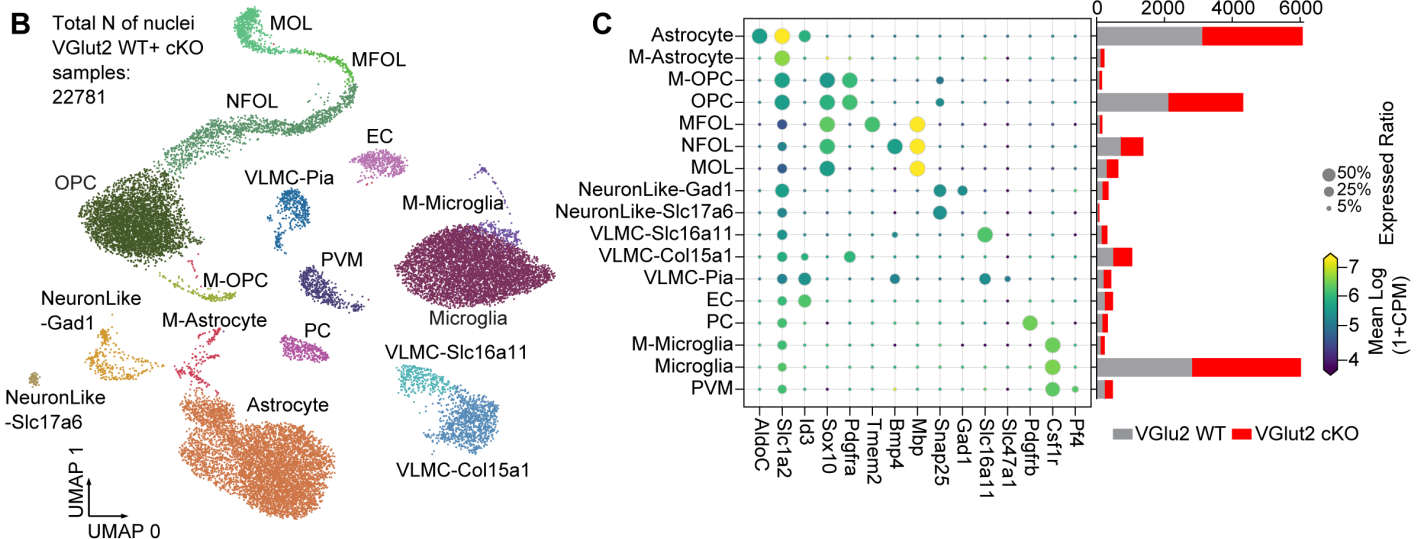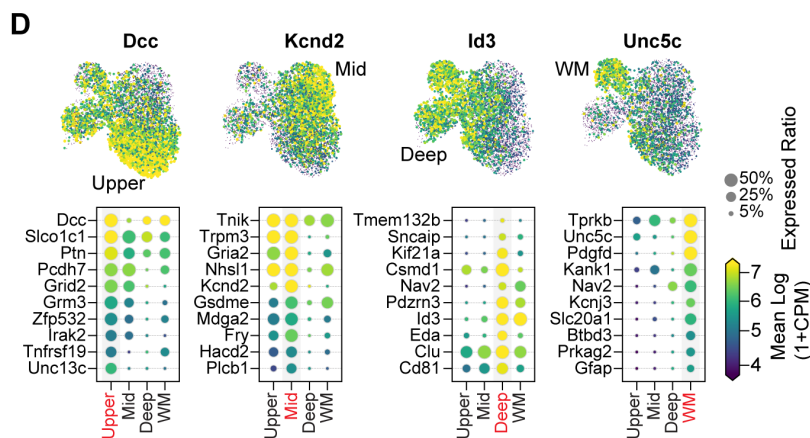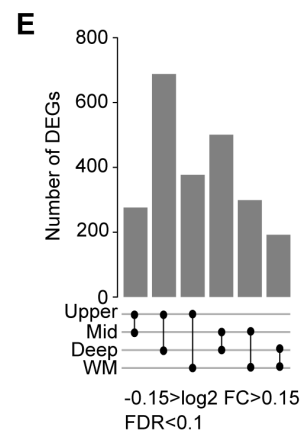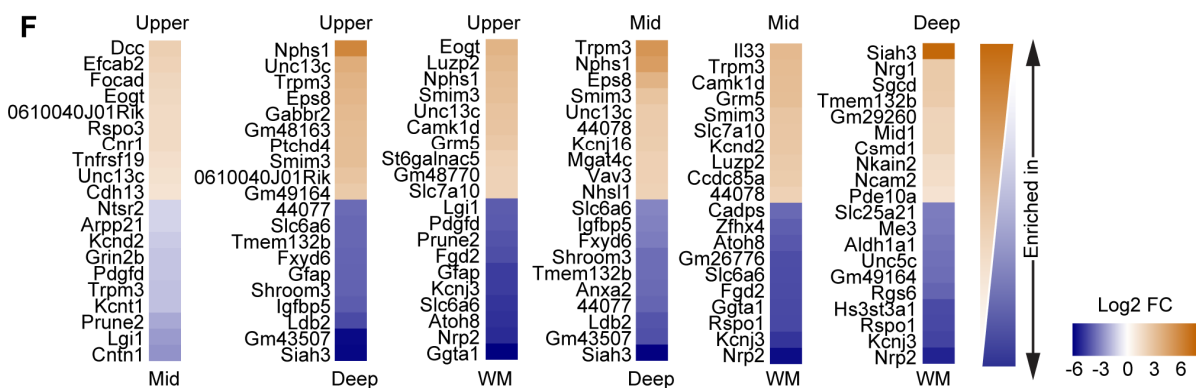

**Figure 6. Unbiased determination of astrocyte layer-enriched genes.** See also Fig S6, Table S5. **A.** Outline of experiment: VCs collected from VGlut2 cKO, Ip3r2 KO and their respective WT controls at P14. Nuclei were isolated from VCs, and sorted for NeuN negative population (glia) using flow cytometry. Sorted nuclei were loaded onto 10x Chromium chip, each nucleus barcoded, followed by library preparation and sequencing. N=8 samples total. **B.** UMAP clustering of different cell types identified in the NeuN negative population of the combined samples from VGlut2 WT and cKO mice. 17 clusters were identified including the 3 main types of glia: astrocytes, oligodendrocytes and microglia, as well as endothelial cells, and two sub-types of neurons (Abbreviations are: M-astrocyte – mitotic astrocyte; M-OPC – mitotic oligodendrocyte precursor cell; OPC – oligodendrocyte precursor cell; MFOL - myelin-forming oligodendrocyte; NFOL - newly formed oligodendrocyte; MOL - mature oligodendrocyte; VLMC- vascular and leptomeningeal cell; EC – Endothelial cell; PC - pericyte; PVM - perivascular macrophage). **C.** Expression level of select marker genes for each cluster. Circle size denotes expression ratio (percent cells expressing the gene), color represents expression level (in Log<sub>2</sub> CPM). Bar chart on the right is the number of cells identified for each genotype as labeled. Similar cell numbers were identified for VGlut2 WT and cKO groups for each cluster. **D.** Unbiased clustering analysis identified 4 subpopulations of astrocytes in the P14 VC. Populations annotated to Upper, Mid, Deep and White matter types following comparison with published datasets. Top panel shows the expression level of select marker genes that label a particular population as indicated. Each dot represents a single nucleus, color represents expression level in Log<sub>2</sub> CPM. Bottom panels show a select list of 10 genes that are highly expressed in each population as indicated. Size of the circle is expression ratio; color is expression level (log<sub>2</sub> CPM). **E.** Pairwise comparison identified ~200-700 DEGs between astrocyte populations from WT mice from the VGlut2 analysis. Criteria for DEG selection: Log<sub>2</sub> FC between -0.15 and 0.15; FDR <0.1. **F.** Heatmap showing top 20 DEGs from each pairwise comparison (**E**) showing genes enriched in one population vs the other (top vs bottom labels). Colors represent Log<sub>2</sub> Fold change (FC) between each population.



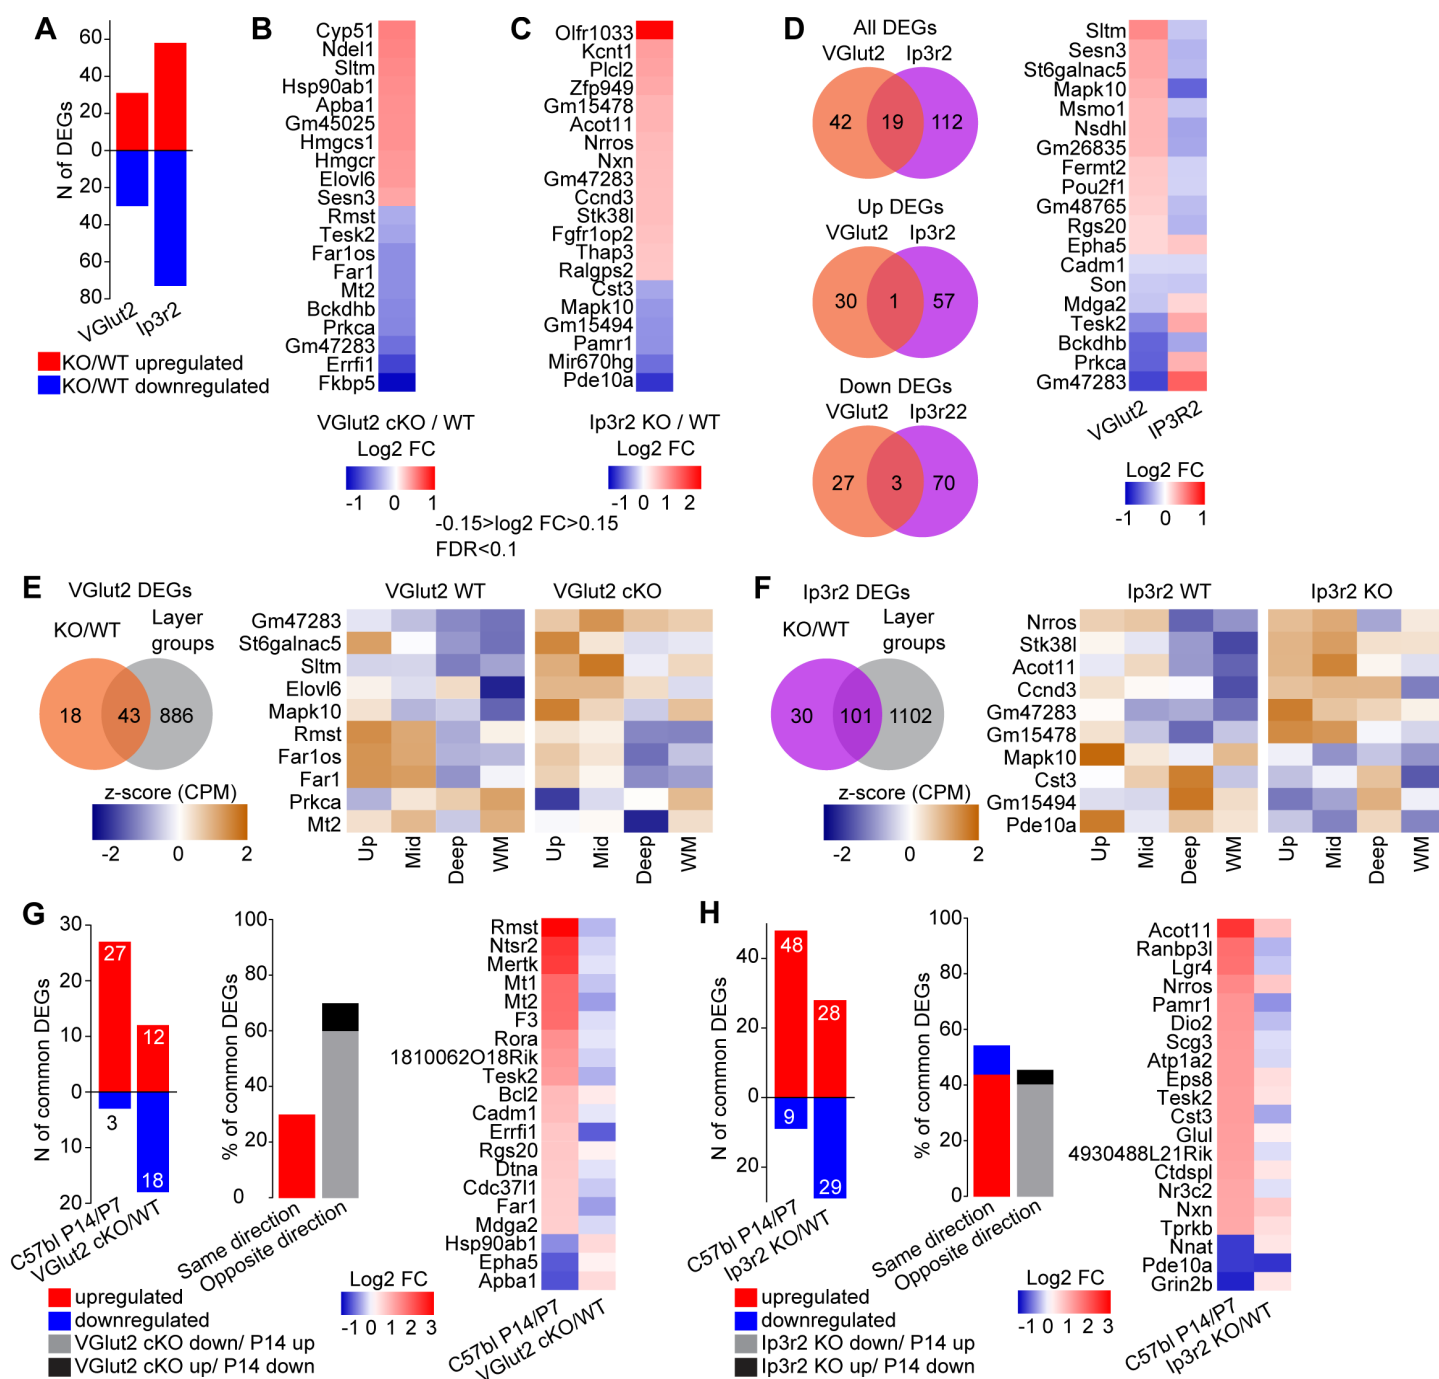

**Figure 7. Global astrocyte gene expression changes following silencing of neuronal or astrocyte activity.** See also Fig S7, Table S6. **A.** Number of DEGs identified for each model: VGlut2 cKO; 61 total DEGs, Ip3r2 KO; 131 total DEGs. Red – upregulated; Blue – downregulated. **B, C.** Heatmap showing top 20 DEGs identified in each model (B, VGlut2 cKO; C, Ip3r2 KO). Colors represent Log2 Fold change (FC) between each condition. Criteria for DEG selection: Log2 FC between -0.15 and 0.15; FDR <0.1. **D.** Venn diagrams showing DEGs common to both models. Heatmap shows FC of the 19 common DEGs. Most common DEGs are differentially regulated in each model (upregulated in VGlut2 cKO and downregulated in Ip3r2 KO). **E.** Venn diagram showing DEGs common to the VGlut2 cKO vs WT comparison and genes enriched in astrocyte layer groups. Heatmap of expression level z score of a select list of 10 genes, shows dysregulation of layer enrichment in the cKO mice compared to WT. Z-score was calculated for each gene using the combined data for WT and cKO average and standard deviation. **F.** Same analysis as E, but for the Ip3r2 KO model. **G.** Comparison between DEGs identified in the VGlut2 cKO dataset with DEGs between P7 and P14 of WT mice, identified in the bulk RNAseq dataset. A total of 30 VGlut2 cKO DEGs were also significantly up- or down-regulated at P14 vs P7. The majority of common DEGs were differentially regulated as shown in the bar graph and heatmap on the right. **H.** Same analysis as in G, but for the Ip3r2 KO model. A total of 57 DEGs were commonly identified in the developmental dataset. About half of the genes were commonly regulated, while the other half were differentially regulated as shown in the bar graph and heatmap on the right. For this analysis the selection criteria of Ribotag P7-P14 DEGs are FPKM>1; FDR<0.1.
